1 **A potent myeloid response is rapidly activated in the lungs of premature Rhesus**  
2 **macaques exposed to intra-uterine inflammation.**

3

4 Courtney M. Jackson<sup>1,2\*</sup>, Martin Demmert<sup>1,3\*</sup>, Shibabrata Mukherjee<sup>1</sup>, Travis Isaacs<sup>1</sup>,  
5 Jerilyn Gray<sup>4</sup>, Paranthaman Senthamarai Kannan<sup>4</sup>, Pietro Presicce<sup>5</sup>, Kashish Chetal<sup>6</sup>,  
6 Nathan Salomonis<sup>6</sup>, Lisa A. Miller<sup>7</sup>, Alan H. Jobe<sup>4</sup>, Suhas G. Kallapur<sup>5</sup>, William J.  
7 Zacharias<sup>4,8</sup>, Ian P. Lewkowich<sup>1</sup>, Hitesh Deshmukh<sup>4</sup>, Claire A. Chougnet<sup>1#</sup>

- 8 1. Division of Immunobiology, Cincinnati Children's Hospital Research Foundation,  
9 Department of Pediatrics, University of Cincinnati College of Medicine, Cincinnati,  
10 Ohio, USA  
11 2. Immunology Graduate Program, University of Cincinnati College of Medicine,  
12 Cincinnati, Ohio, USA  
13 3. Department of Pediatrics, Institute for Systemic Inflammation Research, University  
14 of Lübeck, Lübeck, Germany  
15 4. Division of Neonatology/Pulmonary Biology, The Perinatal Institute, Cincinnati  
16 Children's Hospital Research Foundation, Department of Pediatrics, University of  
17 Cincinnati College of Medicine, Cincinnati, Ohio, USA  
18 5. Divisions of Neonatology and Developmental Biology, David Geffen School of  
19 Medicine at the University of California Los Angeles, Los Angeles, CA USA  
20 6. Division of Biomedical Informatics, Cincinnati Children's Hospital Research  
21 Foundation, Department of Pediatrics, University of Cincinnati College of  
22 Medicine, Cincinnati, Ohio, USA  
23 7. California National Primate Research Center, University of California Davis, Davis,  
24 CA, Department of Anatomy, Physiology, and Cell Biology, School of Veterinary  
25 Medicine, University of California Davis, Davis, CA USA  
26 8. Division of Pulmonary and Critical Care Medicine, Department of Internal  
27 Medicine, University of Cincinnati, Ohio, USA

28 \*Contributed equally.

29 #Corresponding author: Dr. Claire Chougnet, Division of Immunobiology, Cincinnati  
30 Children's Hospital Medical Center, MLC #7038, 3333 Burnet Avenue, Cincinnati, OH  
31 45229-3039. E-mail address: [Claire.Chougnet@cchmc.org](mailto:Claire.Chougnet@cchmc.org), phone number: 513-636-  
32 8847, fax number: 513-636-5355

33

34

35 **Abstract**

36 Intrauterine inflammation/infection (IUI), which is present in up to 40% of premature births,  
37 leads to elevated levels of pro-inflammatory mediators and microbial products within the  
38 amniotic fluid, which come in close contact to fetal mucosae. Yet, knowledge on the fetal  
39 mucosal responses to IUI exposure remains limited. To address these questions, we used  
40 a non-human primate model of IUI, in which pregnant Rhesus macaques received intra-  
41 amniotic (IA) LPS, compared with IA saline.

42 We found that IA LPS exposure induced a robust and rapid inflammation of the fetal lung,  
43 but not the intestine. This inflammatory response was characterized by high levels of pro-  
44 inflammatory cytokines in the lung and the alveolar wash, and a potent myeloid cell  
45 response, dominated by neutrophils and monocytes/macrophages. scRNAseq analyses  
46 of fetal lungs showed that the infiltrating (neutrophils and inflammatory monocytes) and  
47 the resident (alveolar and interstitial macrophages) myeloid cells exhibited transcriptional  
48 profiles consistent with exposure to TLR ligands, as well as to cytokines, notably IL-1 and  
49 TNF $\alpha$ . However, blocking IL-1 signaling or TNF $\alpha$ , alone or simultaneously by  
50 administering inhibitors intra-amniotically and subcutaneously to the dam only partially  
51 blunted fetal lung inflammation.

52 Together, our novel data indicate that the fetal innate immune system can mount a rapid  
53 multi-factorial mucosal innate response to IUI, responding both to direct signaling by  
54 bacterial products and to indirect cytokine-mediated pathways of activation. These data  
55 thus provide more mechanistic insights into the association between IUI exposure and  
56 the post-natal lung morbidities of the premature infant.



## 58 **Introduction**

59 Intrauterine inflammation/infection (IUI) is present in 25-40% of premature births<sup>1</sup>.  
60 Inflammation of the placental membranes at the fetal-maternal interface, which is called  
61 chorioamnionitis (chorio)<sup>2</sup>, leads to elevated levels of pro-inflammatory mediators and  
62 microbial products within the amniotic fluid <sup>2-5</sup>. Due to *in utero* aspiration/swallowing of  
63 the amniotic fluid <sup>6,7</sup>, the mucosae of the developing fetus come in close contact with  
64 these mediators, which triggers an inflammatory response. Although such responses  
65 likely contribute to the increased incidence of post-natal pulmonary and intestinal  
66 morbidities associated with IUI exposure <sup>8-10</sup>, knowledge about the cells and pathways  
67 involved in the fetal mucosal response remains very limited, due to the inability to collect  
68 tissue samples in preterm infants.

69 Fetal lung and intestinal inflammation have been described in IUI animal models  
70 (rodent, rabbits, pig, and sheep). Main features include high levels of pro-inflammatory  
71 cytokines and infiltration of immune cells, as well as damage to the lung and intestine <sup>11-</sup>  
72 <sup>18</sup>. However, the ontogeny of the immune system or the placenta structure are quite  
73 different in these species from those in humans. In contrast, non-human primates (NHP)  
74 are quite similar to humans in most biological aspects. Furthermore, many reagents  
75 developed against human antigens are cross-reactive allowing for in-depth analysis of  
76 the NHP fetal immune system<sup>19-21</sup>. Importantly, we have previously shown that intra-  
77 amniotic (IA) injection of LPS in pregnant Rhesus macaques leads to a type of  
78 inflammation that closely phenocopies severe human chorio <sup>22,23</sup>. Previous studies from  
79 ours and other groups have reported elevated levels of inflammatory cytokines in the lung  
80 of IUI-exposed rhesus macaque fetuses <sup>24,23</sup>, but no in-depth analysis of mucosal immune

81 responses was performed in these studies. Our goal herein was thus to apply state-of-  
82 the art technologies, such as single-cell RNAseq (scRNAseq), to obtain a comprehensive  
83 view of the mucosal immune responses occurring in response to IUI.

84 Furthermore, this model allows us to evaluate the role inflammatory cytokines may  
85 play in these responses. Among the cytokines elevated in the amniotic fluid and cord  
86 blood in chorio, IL-1 $\beta$  and TNF $\alpha$  appear particularly important<sup>4,25</sup>. Indeed, both cytokines  
87 are capable of inducing chorio, and neutrophil infiltration into the fetal lung of Rhesus  
88 macaques when administered IA to pregnant dams<sup>26,27</sup>. In addition, IL-1 $\beta$  is involved in  
89 many aspects of LPS-induced fetal inflammation<sup>22,23,27-30</sup>. We thus aimed at better  
90 delineating their respective role, using the cross-reactive IL-1 receptor antagonist (IL-  
91 1RA) and a blocking anti-TNF Ab (Adalimumab) given either individually, or in  
92 combination.

93 Herein, we show that IA LPS leads to rapid and robust inflammation of the fetal  
94 lung, but not of the fetal intestine. Notably, our analyses identified two main components,  
95 i.e., the recruitment of innate myeloid cells into the fetal lung, and the activation of resident  
96 lung myeloid cells. Although signaling by IL-1 and TNF $\alpha$  were identified as major  
97 transcriptional signatures in responsive myeloid cells, their individual or combined  
98 blockade only partially blunted fetal lung inflammation. Together, our novel data thus  
99 indicate that the fetal innate immune system is capable of mounting a rapid multi-factorial  
100 mucosal response to IUI, responding both to direct signaling by bacterial products such  
101 as LPS, and to indirect cytokine-mediated pathways of activation.

102

## 103 **Results**

### 104 **IA LPS induces robust inflammation in the fetal lung with a minimal response in** 105 **the small intestine.**

106 To model IUI, pregnant Rhesus macaques were given intra-amniotic (IA) injection of LPS  
107 or saline at approximately 80% gestation. Sixteen hours post IA injections, the fetuses  
108 were surgically removed, and tissues collected for analysis. All the animals included in  
109 the study are described in Table S1.

110 We first examined the histological changes in the fetal lung and small intestine. Compared  
111 to controls, lungs from 16hr IA LPS-exposed fetuses displayed signs of inflammation with  
112 cell infiltration into the lung interstitium and decreased alveolar space (Fig. 1A).  
113 Secondary alveoli septa formation also appeared diminished (Fig. 1A). In contrast, in the  
114 jejunum of exposed fetuses, the intestinal villi, lamina propria, or the underlying mucosal  
115 area exhibited no abnormalities (Fig. S1A). Because intestinal inflammation did not  
116 develop until 3 days after IUI in other models (pig<sup>18</sup> and sheep<sup>12,17,31</sup>), we analyzed  
117 jejunum sections taken 48 and 120hrs post IA LPS, and again, found only minimal  
118 changes compared to controls (Fig. S1A).

119 Along with histological evaluations, mRNA expression of inflammatory cytokines was  
120 measured in lung and jejunum at 16hrs post IA LPS. TNF $\alpha$ , IL-6, and IL-1 $\beta$  mRNA levels  
121 were greatly increased in the lung (>100-fold) of IA LPS-exposed fetuses along with  
122 increased detection of these cytokines in the alveolar wash (AW) (Fig. 1B, C). Other pro-  
123 inflammatory cytokines such as IL-8 and CCL2 were also increased (see Tables S2 and  
124 S3). In contrast, IL-10, a known anti-inflammatory molecule was only minimally increased

125 in the AW of LPS-exposed infants (Table S2). In agreement with the absence of  
126 histological alterations in the jejunum, mRNA expression of inflammatory cytokines was  
127 not significantly increased in this compartment (Fig. S1B). Thus, IA LPS induces a rapid  
128 inflammatory response within the fetal lung but has minimal impact on the fetal small  
129 intestine. Our in-depth analyses of fetal mucosal responses thus focused on the lung.

130

### 131 **IA LPS triggers a large infiltration of myeloid cells into the fetal lung.**

132 We next evaluated by scRNAseq the global transcriptional response of the lung in  
133 response to IA LPS (animals and sequencing metrics are described in Table S4). These  
134 analyses revealed distinct immune and non-immune cell populations in both control and  
135 IA LPS-exposed animals (Fig. 2A, Table S5). As our focus was on immune responses,  
136 subsequent analyses were performed on a subset of the whole dataset, containing only  
137 the immune cell clusters. (Fig. 2B). Using established lineage marker genes (see Fig.  
138 2C), we identified the robust accrual of neutrophilic and monocyte/macrophage  
139 populations in the lung of IA LPS-exposed fetuses, compared to control animals (Fig. 2B).  
140 As expected, they highly expressed the myeloid-associated CD88 gene (*C5AR1*, Fig.  
141 2D). These findings were confirmed by flow cytometric analyses of lung cell suspensions  
142 (see gating strategy in Fig. S2), which showed a trend toward a higher proportion of  
143 CD45<sup>+</sup> hematopoietic cells, and, within this population, a significant increase in the  
144 proportion of CD88<sup>+</sup> cells (Fig. 2E).

145 Due to the rapid response within the lung and the type of challenge used, another myeloid  
146 population of interest were dendritic cells (DCs), as DC populations have been described

147 in the human fetal lung<sup>32</sup>. By flow cytometry, we readily identified myeloid dendritic cells  
148 (mDCs) and plasmacytoid DCs (pDCs) in the lung, but their frequencies were unchanged  
149 by IA LPS (Fig. S3). However, these DCs appeared activated in IA LPS-exposed fetuses,  
150 as they both exhibited significantly increased HLA-DR levels (Fig. S3A-B).

151 In contrast to the brisk myeloid response, the frequency of B cells or different T cell  
152 populations, including regulatory T cells, was not changed by IA LPS as seen by flow  
153 cytometry and scRNAseq analyses (Fig. S4A-D). Additionally, analyses of differentially  
154 expressed genes (DEGs) also uncovered relatively few changes (n=342) in these  
155 populations between IA LPS and control animals (Fig S4B, S4D, Table S6).

156 Taken together, our data show that IA LPS rapidly affected fetal innate immune cell  
157 populations in the lung, mainly altering myeloid cells (neutrophils,  
158 monocytes/macrophages, DCs), while having little effect on the major lymphoid cell  
159 subsets.

160

161 **IA LPS leads to the recruitment of inflammatory monocytes into the fetal lung and**  
162 **activates the resident macrophages.**

163 scRNAseq analyses of the lungs of control fetuses revealed the presence of 2  
164 macrophage populations (Fig. 3A), which we identified as alveolar and interstitial  
165 macrophages (Fig. 3B and S5). In the lung of IA LPS-exposed fetuses, another population  
166 of monocytes/macrophages with characteristics of inflammatory monocytes was also  
167 present (Fig. 3A-B and Fig. S5).



168 Next, we identified DEGs in alveolar and interstitial macrophages of IA LPS exposed  
169 lungs compared to controls. The majority of these DEGs were more highly expressed in  
170 LPS than in controls (n=482/620 in alveolar macrophages and n=302/324 in interstitial  
171 macrophages; Table S7, S8). Gene ontology (GO) enrichment analysis of these  
172 upregulated genes revealed several biological processes, including activation of the TLR  
173 signaling pathway, and response to cytokines, notably to IL-1 and TNF (Fig. 3C, Tables  
174 S9 and S10 for full list of genes). Furthermore, genes associated with apoptotic signaling  
175 and cell migration were particularly enriched (Fig. 3C). The fewer down-regulated genes  
176 in the alveolar and interstitial macrophages of IA LPS lungs mainly included ribosomal  
177 protein genes (Tables S6 and S7).

178 There was no inflammatory monocyte cluster in the control lungs, precluding DEG  
179 analysis. However, single sample gene set enrichment analysis (ssGSEA) of this  
180 population in the IA LPS-exposed lungs revealed a similar profile as that found in the  
181 alveolar and interstitial macrophages from the same lungs. Indeed, there was an  
182 enrichment of genes related to activation of the TLR, IL-1 and TNF signaling, as well as  
183 cell migration and apoptosis (Fig. 3D, Table S11 for full list of genes expressed and  
184 enrichment scores). All together, these data thus show that exposure to IUI strongly  
185 affects fetal lung resident macrophages as well as rapidly inducing the afflux of activated,  
186 inflammatory monocytes into the fetal lung.

187

188 **Recruited neutrophils into the fetal lung have a profile of activation suggesting**  
189 **both direct LPS and indirect cytokine-mediated pathways of activation.**

190 Our data also showed a strong neutrophilic response in the fetal lung after IA LPS.  
191 scRNAseq analyses identified *TNFAIP6* (TNF Alpha Induced Protein 6) expression as  
192 one of the most specific markers for neutrophils (Fig. 4A and Fig. S6A). *S100A8* was  
193 also found to be highly expressed in most neutrophils, although it was also present in the  
194 monocyte/macrophage cluster (Fig. 4A). The cluster was further uniquely characterized  
195 by the expression of neutrophil specific markers *AZU1*, *ITGAM*, *NCF2*. By IHC, we  
196 confirmed the presence of multiple *TNFAIP6*<sup>+</sup>*S100A8*<sup>+</sup> cells in the IA LPS fetal lungs,  
197 which were not present in control lungs (Fig. 4B). These cells had neutrophilic  
198 morphology, and they formed aggregates within alveolar spaces (Fig. 4B-C). We  
199 confirmed these data by staining with CD68 and HLA-DR, as we had found that CD68 is  
200 highly expressed in both fetal neutrophils and monocytes/macrophages, with only the  
201 latter expressing HLA-DR. A significantly increased number of CD68<sup>+</sup>HLA-DR<sup>-</sup> cells, with  
202 a neutrophilic morphology, were found in the IA LPS-exposed lungs, also forming  
203 aggregates (Fig. S6B). Furthermore, we found a significant number of neutrophils in the  
204 AW of IA LPS exposed fetuses, whereas they were largely absent in the AW of control  
205 fetuses [median 0.0 v.  $106.3 \times 10^6$  cells/kg in control (n=18) and IA-LPS (n=13),  
206 respectively,  $p < 0.0001$ , Mann-Whitney test].

207 We next analyzed the transcriptomic program of the neutrophils recruited in the fetal lungs  
208 by ssGSEA. These analyses revealed the enrichment of similar processes as those found  
209 in monocytes/macrophages, notably migration, response to TLR, IL-1 and TNF, and  
210 apoptosis (Fig.4D and Table S12 for full list of genes expressed and enrichment scores).

211 Interestingly, and in line with other studies<sup>33,34</sup>, substantial transcriptional heterogeneity  
212 could be seen within these recruited neutrophils. However, no distinct sub-clusters were

213 revealed by UMAP projection (Fig. 5A), suggesting different levels of maturation and/or  
214 activation. We therefore applied pseudo-time analyses as implemented in Monocle3 to  
215 characterize this heterogeneity. Genes that most determined the trajectory were  
216 calculated with spatial autocorrelation analysis (Fig. S7). This analysis revealed that  
217 cytokine and cytokine-response genes were particularly enriched close to the beginning  
218 of the trajectory, whereas expression of other effector genes (e.g., *S100A8/9*, *CAMP*,  
219 *MMP8*) was higher towards more advanced pseudo-time (Fig. 5, S7 and S8). Thus, the  
220 recruited neutrophils into the fetal lung exhibit transcriptional programs revealing different  
221 stages of activation, compatible with both direct activation by LPS and indirect cytokine-  
222 mediated pathways.

223

#### 224 **IL-1 and TNF $\alpha$ signaling are partially driving fetal lung inflammation.**

225 Knowing the role of IL-1 and TNF $\alpha$  in chorio pathogenesis<sup>22,23,26-30</sup>, and because  
226 scRNAseq analyses revealed gene signatures consistent with IL-1 and TNF $\alpha$  signaling in  
227 both the monocyte/macrophage and neutrophil lung populations of IA LPS animals, we  
228 blocked IL-1 signaling with the IL-1RA and TNF $\alpha$  with the blocking anti-TNF Ab  
229 Adalimumab, administered both subcutaneous and IA to the pregnant dams. We also  
230 tested their combined effect (see Fig. S9 for experimental scheme). Both reagents had  
231 previously been shown to be efficacious in macaques<sup>22,23,35</sup>.

232 Cytokine levels in the AW were only partially diminished with any of the treatments (Table  
233 S2). This modest effect was confirmed by the fact that cytokine mRNA expression in the  
234 lung was also minimally decreased in all the treatment groups (Table S3). LPS-induced

235 histological changes (cell infiltration and lung interstitium thickening) remained present in  
236 animals given IL-1RA or anti-TNF, although lung interstitium thickening was partially  
237 decreased in animals given both inhibitors (Fig. 6A).

238 Infiltration of myeloid cells into the lung was not blunted by any of the treatments, as  
239 shown by both scRNAseq and flow cytometry analyses (Fig. 6B-C). Neutrophil  
240 accumulation in the AW was also not blunted ( $p > 0.9$ , Kruskal-Wallis tests). Similar  
241 monocyte/macrophage populations were present in the lung of treated animals as in IA  
242 LPS animals (Fig. 7A). However, the blockades partially suppressed some of the  
243 biological processes activated by IA LPS (Fig. 7B and S10A-C). Notably, there was a  
244 downward trend of the expression of genes associated with the TLR, IL-1, and TNF $\alpha$   
245 signaling pathways in the alveolar and interstitial macrophages, which appeared most  
246 marked in the animals that had received the combined treatment (Fig. 7B). Blockades  
247 also decreased the expression of genes associated with cell migration and apoptotic  
248 signaling in these cells (Fig. S10A-B). However, the blockades did not blunt these  
249 processes in the inflammatory monocytes (Fig. 7B and S10C).

250 Neutrophil migration into the lung was also not diminished by any of the blockades (Fig.  
251 8A). As in the inflammatory monocytes, the blocking treatments did not markedly alter the  
252 neutrophilic transcriptome (Fig. 8B and S10D).

253 Blockades lead to a decreased frequency of the mDC population, decreasing it below that  
254 present in the control animals (Fig. S11). mDC activation, as evidenced by high HLA-DR  
255 MFI, was diminished by the treatments (Fig. S11). In that case, the strongest effect was  
256 seen in animals that received IL-1RA, alone or in combination (Fig. S11).

## 257 **Discussion**

258 Premature infants exposed to IUI are at increased risk of developing pulmonary and  
259 intestinal morbidities after birth <sup>9,36,37</sup>. Herein, we applied several complementary  
260 techniques to obtain a comprehensive view of the fetal mucosal immune response to IUI  
261 in the highly relevant Rhesus macaque model.

262 In this model, shortly after IA LPS, robust inflammation developed in the fetal lungs,  
263 characterized by the accumulation of immune cells into the lung and increased levels of  
264 many inflammatory mediators both in the lung tissue and the AW, similar to what had  
265 previously been described in other IUI animal models <sup>10,11,28,29</sup>. Myeloid cells were  
266 particularly involved, as the major cellular change occurring in the lungs of IA LPS-  
267 exposed fetuses was the massive accrual of neutrophils and inflammatory monocytes,  
268 which were absent in the control lungs. In addition, resident myeloid cells, both the  
269 alveolar and interstitial macrophages and the resident myeloid DCs, exhibited many signs  
270 of activation. Notably, scRNAseq analyses identified that response to pro-inflammatory  
271 cytokines, such as IL-1 and TNF, or to TLR, were activated in these subsets. Many of  
272 the activated biological processes were shared by the monocyte/macrophage and  
273 neutrophil populations, highlighting a general inflammatory transcriptional program.  
274 Overall, these data indicate that the fetal innate immune system can rapidly mount a  
275 strong response, a concept that remains controversial. Indeed, there have been many  
276 papers describing functional impairment in fetal/neonatal neutrophils and  
277 monocytes/macrophages as compared to their juvenile and adult counterparts (rev. in <sup>38-</sup>  
278 <sup>40</sup>). Described defects notably include the decreased recruitment of neutrophils and  
279 inflammatory monocytes into the lung in response to *E. coli* instillation during the same

280 time period, compared to juvenile mice<sup>41</sup>. In contrast, our data in a NHP model argue that  
281 fetal neutrophils and inflammatory monocytes can quickly migrate into the pulmonary  
282 environment, as these two populations became very abundant in the lung 16hrs after IA  
283 LPS. Neutrophils appeared to localize in the lung in the form of aggregates, a pattern  
284 reminiscent of that described in murine models of acute lung injury<sup>42,43</sup>. Similarly, other  
285 groups had described rapid recruitment of neutrophils in fetal sheep or rhesus macaque  
286 lungs in response to IA LPS or IL-1 $\beta$ <sup>27,28</sup>. It is also to be noted that the concept of  
287 defective functionality of innate immune cells in human neonates mainly arises from  
288 studying *in vitro* stimulated cord blood cells. It is therefore possible that these assays do  
289 not fully reveal their potential. Another caveat to remember when interpreting data about  
290 preterm babies' immune cell functions, is that many of these infants had just been given  
291 steroids, which affect various cell type functionality. We did not administer steroids in our  
292 studies, which may have allowed us to observe such robust immune responses.

293 Until recently, circulating and tissue neutrophils were considered as a homogeneous  
294 population with a defined array of functions. This concept has been challenged by many  
295 studies that revealed a high degree of variety in this population (rev. in<sup>44-49</sup>). Two main  
296 mechanisms appear to drive this diversity, an intrinsic heterogeneity already initiated in  
297 bone marrow precursors on one hand, and on the other hand a highly dynamic  
298 transcriptional and epigenetic program triggered by exposure to the environment, notably  
299 in inflammatory conditions. Our pseudo-time analyses concur with the concept of  
300 functional heterogeneity, as they show several gene expression profiles within the  
301 neutrophils recruited to the lungs of IA LPS exposed animals. For example, genes related  
302 to granule content (*CAMP*, *LCN2*) or antimicrobial defense (*S100A8*, *S100A9*) were in

303 general not simultaneously expressed along inflammatory mediators (*IL1A*, *IL1B*, *CCL2*,  
304 *CCL20*). Interestingly, *Bcl2A1*, a major pro-survival factor for neutrophils<sup>50</sup>, including for  
305 LPS-activated neutrophils in the Rhesus chorio-decidua<sup>22</sup>, was also heterogeneously  
306 expressed among the lung neutrophils in LPS-exposed animals, suggesting that  
307 differential survival may affect neutrophil heterogeneity. Future studies will be needed  
308 to further characterize at the protein level neutrophil heterogeneity and its impact on fetal  
309 responses to IUI.

310 We were also able to evaluate the role played by IL-1 or TNF $\alpha$  in fetal mucosal responses  
311 to IA LPS. Our data show that blocking either or both of these pathways had only a partial  
312 effect on lung inflammation, a finding consistent with the fact that fetal responses were  
313 likely driven by both direct activation by LPS and indirect cytokine-mediated pathways.  
314 The partial amelioration of disease by IL-1RA is similar to what has been previously  
315 described in other IUI models<sup>22,23,28,30</sup>, while this was, to our knowledge, the first attempt  
316 at evaluating the effect of anti-TNF alone or in combination with IL-1RA. In general, the  
317 anti-TNF Ab appeared to have broader effectiveness than IL-1RA, which may be due to  
318 the fact that this treatment decreased levels of IL-1 $\beta$  expression in the lung tissue and  
319 AW, whereas IL-1RA did not affect TNF $\alpha$  levels (Tables S2-S3). Interestingly, the  
320 combination of both blockades did not radically ameliorate the effectiveness, which  
321 suggests that the two pathways are inter-connected, and that other mediators control the  
322 recruitment of myeloid cells into the lung. Notably, levels of CCL2, which regulates many  
323 aspects of monocyte biology, including recruitment, activation, and survival (rev. in<sup>51</sup>),  
324 remained elevated in the lung tissue and AW of treated animals. Lung expression of  
325 CXCL12, which plays a role in myeloid cell recruitment during lung injury<sup>52,53</sup>, might also

326 be involved. Our data also show that high levels of IL-8 persisted in the lung and AW  
327 despite the blockades (Tables S2 and S3). Furthermore, many neutrophilic  
328 chemoattractant molecules, including chemotactic lipids, formyl peptides, and  
329 complement anaphylatoxins are also released during inflammation (rev. in <sup>54</sup>). We did not  
330 quantify these mediators in fetal lungs or AW, but because they are released through both  
331 TLR and cytokine-mediated mechanisms, it is likely that they were still released despite  
332 the blockades. Interestingly, compared to the fetal lung, myeloid cell recruitment in the  
333 placenta was significantly reduced in the presence of either IL-1RA or anti-TNF <sup>22,35</sup>,  
334 suggesting that the mechanisms controlling cellular migration might be tissue specific.  
335 Alternatively, and not exclusively, the fact that cells recruited in the placenta have a  
336 maternal origin, in contrast to fetal cells migrating to the lungs, may also have driven some  
337 of these differences.

338 Overall, our work in a model that phenocopies the main features of human IUI gives novel  
339 insights into the inflammation rapidly developing in the fetal lung following such exposure.  
340 One important conclusion from our new data is that the fetal immune system is highly  
341 responsive to its environment. In this model of acute sterile inflammation, we saw that  
342 fetal myeloid cells could be rapidly mobilized, migrating to the inflamed environment and  
343 displaying profiles of activation very similar to those described in adult cells. This confirms  
344 the new paradigm in the field of neonatal immunology, e.g., that fetuses have the capacity  
345 to mount a very robust innate immune response. Our data also emphasize the fact that  
346 the fetal lung is particularly responsive, as it is in close contact with the amniotic fluid,  
347 whereas the fetal gut appears less affected. This study thus provides more insights into  
348 why the most solid associations found between IUI exposure and post-natal morbidities



349 in humans involved mainly the lung (bronchopulmonary dysplasia, wheeziness, and  
350 asthma). Our data also show that the multi-parametric mucosal inflammation that  
351 develops in IUI-exposed fetuses is not easily controlled by blocking only one, or two  
352 inflammatory mediators, emphasizing the need for additional mechanistic studies to better  
353 understand the dynamic and complex responses that IUI triggers in exposed fetuses.

354

355

356

357

358

359

360

361

362

363

364

365

366

367 **Materials and Methods.**

368 **Animals.**

369 The Institutional Animal Care and Use Committee at the University of California, Davis  
370 approved all animal procedures. Normally cycling, adult female Rhesus macaques  
371 (*Macaca mulatta*) were time mated. At approximately 130 days of gestation (about 80%  
372 of term gestation), the pregnant dams received either 1 ml saline solution or 1mg of LPS  
373 (Sigma-Aldrich, St. Louis MO) in 1 ml saline solution by ultrasound guided IA injection. IA  
374 administration of LPS or saline was performed in mothers of similar weights and ages  
375 with fetus with similar fetal genders and gestational ages (Table S1). Fetuses were  
376 surgically delivered 16, 48 or 120 hrs later by cesarean section. Delivered fetuses were  
377 euthanized with pentobarbital and tissues collected. There were no spontaneous deaths  
378 or preterm labor in the animals. Some pregnant dams were given, in addition to IA LPS,  
379 either the IL-1RA (Kineret® Sobi, Stockholm, Sweden), or the anti-TNF Ab Adalimumab  
380 (HUMIRA® AbbVie Chicago, IL), or both. These inhibitors were administered  
381 subcutaneously (100mg or 40mg for IL-1RA and anti-TNF respectively) 3hrs before IA  
382 LPS as well as IA (50mg or 40 mg for IL-1RA and anti-TNF respectively) 1hr before IA  
383 LPS (see scheme on Fig. S9).

384 **Histological evaluation of fetal lung and jejunum.**

385 Inflated lung (30cm water pressure) and jejunum tissues were fixed in 10% formalin  
386 immediately following removal. After a series of alcohol and xylene washes, tissues were  
387 blocked in paraffin. Paraffin sections were stained with hematoxylin & eosin (H&E). 20x  
388 images were taken with a Nikon 90i Upright Widefield Microscope (Nikon Instruments

389 Inc., Melville, NY). 100 $\mu$ m scale bar added using Nikon Elements Software (Nikon  
390 Instruments Inc., Melville, NY).

### 391 **Immunofluorescence staining of neutrophils and confocal analysis.**

392 Upper left lung lobe sections (5 $\mu$ m thick) were blocked with 4 % goat serum in PBS, and  
393 then incubated 1hr at room temperature with the primary mouse-anti-human Ab diluted in  
394 4% goat serum in PBS. Cross-reactivity of all Ab with Rhesus macaque cells was verified  
395 on adult tissues prior to their utilization to stain fetal cells. Ab were titrated for optimal  
396 detection of positive populations and MFI. Sections stained with unlabeled Ab were  
397 stained with a corresponding secondary goat-anti-mouse Ab conjugated with either Alexa  
398 Fluor 594, Alexa Fluor 488 or FITC (Life Technologies, dilution 1:400) for 1hr. As negative  
399 control, tissues were also stained with the secondary Ab only. Sections were washed and  
400 incubated with Vecta shield autofluorescence reduction kit and mounted with mounting  
401 media containing DAPI (Vector Laboratories). Images were acquired using an inverted  
402 microscope (Ti-E; Nikon, Japan) outfitted with a confocal scan-head (A1R; Nikon; Japan)  
403 at the CCHMC Confocal Imaging Core. Analyses involving deconvolution and background  
404 reduction were done with Nikon Elements Software.

405 Since neutrophils in the sections were mostly in clumps/aggregates, we evaluated the  
406 number of neutrophil aggregates in 10 fields per animal. The neutrophils were identified  
407 as S100A8-FITC (CF-145) and TNFAIP6-AF594 (polyclonal) (both ThermoFisher  
408 Waltham, MA) double positive cells. The average area covered by neutrophils clumps  
409 were also determined and normalized to the total DAPI area of the image per field. CD68-  
410 FITC (KP1) (Alligent Dako, Santa Clara, CA) and HLADR-AF594 (L243) (BioLegend, San  
411 Diego, CA) were also used to quantify neutrophils.

412 **Alveolar wash analyses.**

413 Alveolar wash was collected from the left lung. Supernatant was collected and frozen  
414 until cytokine analyses, using the NHP multiplex kit according to the manufacturer's  
415 protocol (Millipore Austin, TX). Cell pellets was cytospun and slides were stained with  
416 Diff quick. 5 fields/slide (100 cells/field) were counted twice.

417 **Quantitative RT-PCR analyses of mucosal tissues.**

418 From frozen lung and jejunum tissue, total RNA was extracted after homogenizing in  
419 TRIzol (Invitrogen, Carlsbad, CA). A Nanodrop spectrophotometer (Thermo Fisher  
420 Scientific) was used to measure RNA concentration and quality. 1µg of RNA was used to  
421 generate cDNA using the Verso cDNA synthesis kit (Thermo Fisher Scientific), following  
422 the manufacturer's protocol. Quantitative RT-PCR was done with a StepOnePlus real-  
423 time PCR system and rhesus specific TaqMan gene expression primers (Life  
424 Technologies, Carlsbad, CA). Eukaryotic 18S rRNA was the endogenous control used for  
425 normalization of the target RNAs. The mRNA fold change was calculated relative to the  
426 average value of the control group.

427 **Fetal lung cell isolation.**

428 The fetal lung was removed, and left lobe was processed into single cell suspensions as  
429 described previously<sup>55</sup>. The large airways were removed and approximately ~500mg of  
430 airway free tissue was collected in a gentleMACS C-tube (Miltenyi Biotec, Auburn, CA)  
431 and 5mL digest buffer was added and placed on a gentleMACS octo dissociator for  
432 programmed runs. Following dissociation, the cell suspension was passed through a  
433 100µm filter and washed with PBS. After washing, cells underwent red cell lysis

434 (eBioscience, San Diego, CA) along with another pass through a 40um filter after  
435 neutralization.

#### 436 **Single cell sequencing of fetal lung cells.**

437 scRNA-seq analyses were done in a subset of animals (Table S4). ~50,000 cells per lung  
438 were submitted for single cell sequencing at the Cincinnati Children's Hospital Medical  
439 Center DNA Sequencing and Genotyping Core. Approximately ~16,000 cells were loaded  
440 into one channel of the Chromium system using the 3 prime v3 single cell reagent kit (10X  
441 Genomics, Pleasanton, CA). Following capture and lysis, cDNA was synthesized and  
442 amplified as per the manufacturer's protocol (10X Genomics). The amplified cDNA was  
443 used to construct Illumina sequencing libraries that were each sequenced using an  
444 Illumina HiSeq 4000 machine. Raw sequencing data was processed aligned to the  
445 Rhesus macaque reference Mmul\_8.0.1 (Ensembl version 91) with Cell Ranger 3.0.2  
446 (10X Genomics) generating expression count matrix files.

447 After doublet removal with the software DoubletFinder (version 2.0), an integrated  
448 analysis was performed using R (version 3.6.3) and the Seurat package (version 3.1.0,  
449 <https://satijalab.org/seurat/>), to identify common cell types across different experimental  
450 conditions. Specifically, cells with 25% or more mitochondrial transcripts were removed,  
451 as well as cells expressing fewer than 150 or more than 5000 features. After log-  
452 normalization, 5000 highly variable features were identified per sample using the vst  
453 method. Integration was performed using the Seurat FindIntegrationAnchors and  
454 IntegrateData functions with default parameter values. The integrated data was scaled,  
455 including regressing out mitochondrial percentage and cell cycle variables, followed by

456 application of PCA reduction. A UMAP projection was estimated based on the PCA  
457 reduction and the correlation metric. Clustering of cells was done using the Seurat  
458 functions FindNeighbors (based on first 30 PCs) and FindClusters (resolution=4). This  
459 high-resolution was initially used to define highly discrete immune populations, with the  
460 final populations subsequently aggregated into broader, higher confidence cell-types  
461 based common marker genes expressed and corresponding UMAP embeddings. To  
462 annotate these cell-populations, we performed a gene-set enrichment analysis on the  
463 aggregated cell populations using established human and mouse cell-population marker  
464 genes annotated by LungMAP, from the AltAnalyze and ToppCell databases. Immune  
465 cell population labels were further evidenced using label transfer with the software  
466 cellHarmony against a recently described reference human lung datasets<sup>56,57</sup>. Clusters  
467 were orthogonally validated using the software ICGS2 in AltAnalyze, which does not  
468 require a resolution setting, to confirm their presence. Identified immune cell clusters were  
469 subset into a new Seurat object and re-clustered. For further analyses, Y-chromosomal  
470 genes were removed from the dataset because both IA LPS-exposed fetuses were male  
471 whereas animals of both sexes were present in the other experimental groups.  
472 Additionally, we checked for the expression of genes *XIST* and *TSIX*, which did not  
473 appear in our dataset and seem to not be drivers of differences observed. All identified  
474 cell populations were required to have unique reported marker genes to ensure they were  
475 not artifacts of “over-clustering”. Differential gene expression analysis was performed as  
476 implemented in Seurat. Plots were generated using the ggplot2 package (version 3.3.2).  
477 Differentially expressed genes (DEGs) between control and LPS in the  
478 monocyte/macrophage cluster with a fold change (FC) of  $\geq 1.2$  and adjusted p-value of  $\leq$

479 0.05 were used for functional enrichment analysis of biological processes and pathways  
480 using the ToppFun web portal<sup>58</sup>. Terms with higher expression in LPS are represented  
481 as positive log p-values. Scaled expression of genes for upregulated biological processes  
482 terms in the monocyte/macrophage cluster were used to plot parallel coordinate plots  
483 using the ggplot2 package.

484 Differential gene expression analysis was not feasible for the neutrophil or inflammatory  
485 monocyte clusters since those cells were not present in control samples (<20 cells). We  
486 thus performed single sample gene set enrichment analysis (ssGSEA) in R using the  
487 ssgsea2.0 package ([github.com/broadinstitute/ssGSEA2.0](https://github.com/broadinstitute/ssGSEA2.0)) in order to identify enriched  
488 gene ontology (GO) gene sets (MSigDB v7.0). Expression values of overlapping genes  
489 of the most significant and relevant gene sets were plotted as parallel coordinate plots  
490 using ggplot2.

491 In order to assess possibly different states of gene expression within neutrophils after  
492 LPS exposure, single-cell trajectory analysis was performed with Monocle3 (version  
493 0.2.3.0). Spatial autocorrelation analysis as implemented in Monocle3 was used to  
494 determine genes that most strongly vary along the pseudo-time trajectory. The Monocle  
495 algorithm is capable of ordering cells based on their transcriptomic profile in an  
496 unsupervised manner and thus arrange cells along a directional path. The order of the  
497 cells along this path represents different transcriptomic states within a biological process  
498 even if cells are obtained at only one time point during an experiment. The scRNA-seq  
499 data have been deposited in the Gene Expression Omnibus (GSE169390, reviewer  
500 token:qxatqgkyhxyrhkl).

## 501 **Flow Cytometry.**

502 A cocktail of conjugated Ab was used to phenotype lung cell suspensions for multi-  
503 parameter flow-cytometry. The following Ab were used: HLA-DR (L243), CD11c (3.9)  
504 (BioLegend, San Diego, CA); CD3 (GHI/61), CD3 (SP34-2), CD19 (SJ25C1), CD20  
505 (2H7), CD123 (7G3), CD45 (DO58-1283) (BD Biosciences, San Jose, CA); CD8 $\alpha$  (RPA-  
506 T8), FoxP3 (PCH101), LIVE/DEAD Fixable Aqua dead cell stain, (eBioscience, San  
507 Diego, CA), CD88 (P12/1) (Bio-rad, Hercules, CA). Lung cell suspensions were treated  
508 with human IgG to block Fc-receptors and stained for surface markers. Cells were then  
509 washed and treated with fixation/permeabilization buffer (ThermoFisher). Following  
510 permeabilization, cells were stained for intracellular markers, washed, and resuspended  
511 in PBS. Cells were collected on a FACS Fortessa (BD Bioscience San Jose, CA). BD  
512 FACSDiva Software v8.0.1 (BD Bioscience San Jose, CA) was used for analysis.

## 513 **Statistical analyses.**

514 GraphPad Prism 8 (GraphPad Software, La Jolla, California, USA) was used to graph  
515 and analyze data for statistical significance. Data were first checked for normality and  
516 values expressed as either mean  $\pm$ SEM or median and interquartile range. Statistical  
517 differences between 2 groups were analyzed using Mann-Whitney U-tests or Student's t-  
518 test. For comparison of more than two groups, Kruskal-Wallis or One-way ANOVA were  
519 used. Results were considered significantly different for p values  $\leq$ 0.05. However, due to  
520 the limited number of samples in some groups, we also report trends (p values between  
521 0.05 and 0.1).

## 522 **Author contributions.**



523 C.A.C, A.H.J., H.D., S.G.K., L.A.M., I.P.J. and W.J.Z. conceived the study. C.M.J., S.M.,  
524 P.P., T.I., P.S., M.C., M.D. and J.G. all performed experiments and data analysis. N.S.  
525 and K.C. did the initial pre-processing of scRNAseq 10X files. All authors critically  
526 reviewed the manuscript and approved the final version.

## 527 **Acknowledgments.**

528 The authors would like to thank the staff at the California National Primate Research  
529 Center for their outstanding technical support, and especially Paul-Michael Sosa, Jennifer  
530 Kendrick, and Sarah Davis and for invaluable help in animal management and care. We  
531 also thank Cincinnati Children's Hospital Medical Center's Research Flow Cytometry,  
532 Confocal Imaging, and DNA Sequencing and Genotyping Cores.

533

534 **Grant funding:** This work was funded by NIH (U01ES029234, K08HD084686,  
535 R01HL142708, K08HL140178-01A1) and CCHMC (Academic and Research Committee  
536 Grant).

537

538

539

540

541

542

## 543 References

- 544 1 Goldenberg, R. L., Culhane, J. F., Iams, J. D. & Romero, R. Epidemiology and causes of preterm  
545 birth. *The Lancet* **371**, 75-84, doi:10.1016/S0140-6736(08)60074-4 (2008).
- 546 2 Kim, C. J. *et al.* Acute chorioamnionitis and funisitis: definition, pathologic features, and clinical  
547 significance. *Am J Obstet Gynecol* **213**, S29-S52, doi:10.1016/j.ajog.2015.08.040 (2015).
- 548 3 Saji, F. *et al.* Cytokine production in chorioamnionitis. *Journal of Reproductive Immunology* **47**,  
549 185-196, doi:[https://doi.org/10.1016/S0165-0378\(00\)00064-4](https://doi.org/10.1016/S0165-0378(00)00064-4) (2000).
- 550 4 Revello, R., Alcaide, M. J., Dudzik, D., Abehsera, D. & Bartha, J. L. Differential amniotic fluid  
551 cytokine profile in women with chorioamnionitis with and without funisitis. *The Journal of*  
552 *Maternal-Fetal & Neonatal Medicine* **29**, 2161-2165, doi:10.3109/14767058.2015.1077512  
553 (2016).
- 554 5 Gomez, R. *et al.* The fetal inflammatory response syndrome. *American Journal of Obstetrics &*  
555 *Gynecology* **179**, 194-202, doi:10.1016/S0002-9378(98)70272-8 (1998).
- 556 6 Gitlin, D., Kumate, J., Morales, C., Noriega, L. & Arévalo, N. The turnover of amniotic fluid  
557 protein in the human conceptus. *American Journal of Obstetrics & Gynecology* **113**, 632-645,  
558 doi:10.1016/0002-9378(72)90632-1 (1972).
- 559 7 ROSS, M. G. & NIJLAND, M. J. M. Fetal Swallowing: Relation to Amniotic Fluid Regulation. *Clinical*  
560 *Obstetrics and Gynecology* **40**, 352-365 (1997).
- 561 8 Jobe, A. H. Effects of chorioamnionitis on the fetal lung. *Clin Perinatol* **39**, 441-457,  
562 doi:10.1016/j.clp.2012.06.010 (2012).
- 563 9 Been, J. V., Lievense, S., Zimmermann, L. J. I., Kramer, B. W. & Wolfs, T. G. A. M.  
564 Chorioamnionitis as a Risk Factor for Necrotizing Enterocolitis: A Systematic Review and  
565 Meta-Analysis. *The Journal of Pediatrics* **162**, 236-242.e232, doi:10.1016/j.jpeds.2012.07.012  
566 (2013).
- 567 10 Kallapur, S. G., Presicce, P., Rueda, C. M., Jobe, A. H. & Chougnet, C. A. Fetal immune response  
568 to chorioamnionitis. *Semin Reprod Med* **32**, 56-67, doi:10.1055/s-0033-1361823 (2014).
- 569 11 Kallapur, S. G., Willet, K. E., Jobe, A. H., Ikegami, M. & Bachurski, C. J. Intra-amniotic endotoxin:  
570 chorioamnionitis precedes lung maturation in preterm lambs. *American Journal of Physiology-*  
571 *Lung Cellular and Molecular Physiology* **280**, L527-L536, doi:10.1152/ajplung.2001.280.3.L527  
572 (2001).
- 573 12 Wolfs, T. G. A. M. *et al.* Chorioamnionitis-induced fetal gut injury is mediated by direct gut  
574 exposure of inflammatory mediators or by lung inflammation. *Am J Physiol Gastrointest Liver*  
575 *Physiol* **306**, G382-G393, doi:10.1152/ajpgi.00260.2013 (2014).
- 576 13 Gras-Le Guen, C. *et al.* Antenatal infection in the rabbit impairs post-natal growth and lung  
577 alveolarisation. *European Respiratory Journal* **32**, 1520-1528, doi:10.1183/09031936.00023708  
578 (2008).
- 579 14 Pan, J. *et al.* Effects and molecular mechanisms of intrauterine infection/inflammation on lung  
580 development. *Respir Res* **19**, 93-93, doi:10.1186/s12931-018-0787-y (2018).
- 581 15 Wolfs, T. G. A. M. *et al.* Endotoxin induced chorioamnionitis prevents intestinal development  
582 during gestation in fetal sheep. *PLoS One* **4**, e5837-e5837, doi:10.1371/journal.pone.0005837  
583 (2009).
- 584 16 Wolfs, T. G. A. M. *et al.* Antenatal ureaplasma infection impairs development of the fetal ovine  
585 gut in an IL-1-dependent manner. *Mucosal Immunology* **6**, 547-556, doi:10.1038/mi.2012.97  
586 (2013).

- 587 17 Wolfs, T. G. A. M. *et al.* IL-1 $\alpha$  mediated chorioamnionitis induces depletion of FoxP3+ cells and  
588 ileal inflammation in the ovine fetal gut. *PLoS One* **6**, e18355-e18355,  
589 doi:10.1371/journal.pone.0018355 (2011).
- 590 18 Nguyen, D. N. *et al.* Prenatal Intra-Amniotic Endotoxin Induces Fetal Gut and Lung Immune  
591 Responses and Postnatal Systemic Inflammation in Preterm Pigs. *The American Journal of*  
592 *Pathology* **188**, 2629-2643, doi:10.1016/j.ajpath.2018.07.020 (2018).
- 593 19 Makori, N. *et al.* Functional and morphological development of lymphoid tissues and immune  
594 regulatory and effector function in rhesus monkeys: cytokine-secreting cells, immunoglobulin-  
595 secreting cells, and CD5(+) B-1 cells appear early in fetal development. *Clin Diagn Lab Immunol*  
596 **10**, 140-153, doi:10.1128/cdli.10.1.140-153.2003 (2003).
- 597 20 Messaoudi, I., Estep, R., Robinson, B. & Wong, S. W. Nonhuman primate models of human  
598 immunology. *Antioxid Redox Signal* **14**, 261-273, doi:10.1089/ars.2010.3241 (2011).
- 599 21 Miller, L. A., Royer, C. M., Pinkerton, K. E. & Schelegle, E. S. Nonhuman Primate Models of  
600 Respiratory Disease: Past, Present, and Future. *ILAR J* **58**, 269-280, doi:10.1093/ilar/ilx030  
601 (2017).
- 602 22 Presicce, P. *et al.* IL-1 signaling mediates intrauterine inflammation and chorio-decidua  
603 neutrophil recruitment and activation. *JCI Insight* **3**, e98306, doi:10.1172/jci.insight.98306  
604 (2018).
- 605 23 Rueda, C. M. *et al.* Lipopolysaccharide-Induced Chorioamnionitis Promotes IL-1-Dependent  
606 Inflammatory FOXP3+ CD4+ T Cells in the Fetal Rhesus Macaque. *J Immunol* **196**, 3706-3715,  
607 doi:10.4049/jimmunol.1502613 (2016).
- 608 24 Novy, M. J. *et al.* Ureaplasma parvum or Mycoplasma hominis as Sole Pathogens Cause  
609 Chorioamnionitis, Preterm Delivery, and Fetal Pneumonia in Rhesus Macaques. *Reproductive*  
610 *Sciences* **16**, 56-70, doi:10.1177/1933719108325508 (2009).
- 611 25 Døllner, H., Vatten, L., Halgunset, J., Rahimipour, S. & Austgulen, R. Histologic chorioamnionitis  
612 and umbilical serum levels of pro-inflammatory cytokines and cytokine inhibitors. *BJOG: An*  
613 *International Journal of Obstetrics & Gynaecology* **109**, 534-539, doi:10.1111/j.1471-  
614 0528.2002.01028.x (2002).
- 615 26 Sadowsky, D. W., Adams, K. M., Gravett, M. G., Witkin, S. S. & Novy, M. J. Preterm labor is  
616 induced by intraamniotic infusions of interleukin-1 $\beta$ ; and tumor necrosis factor- $\alpha$   
617 but not by interleukin-6 or interleukin-8 in a nonhuman primate model. *American Journal of*  
618 *Obstetrics & Gynecology* **195**, 1578-1589, doi:10.1016/j.ajog.2006.06.072 (2006).
- 619 27 Kallapur, S. G. *et al.* Intra-amniotic IL-1 $\beta$  induces fetal inflammation in rhesus monkeys and  
620 alters the regulatory T cell/IL-17 balance. *J Immunol* **191**, 1102-1109,  
621 doi:10.4049/jimmunol.1300270 (2013).
- 622 28 Kallapur, S. G. *et al.* IL-1 mediates pulmonary and systemic inflammatory responses to  
623 chorioamnionitis induced by lipopolysaccharide. *Am J Respir Crit Care Med* **179**, 955-961,  
624 doi:10.1164/rccm.200811-1728OC (2009).
- 625 29 Willet, K. E. *et al.* Intra-amniotic injection of IL-1 induces inflammation and maturation in fetal  
626 sheep lung. *American Journal of Physiology-Lung Cellular and Molecular Physiology* **282**, L411-  
627 L420, doi:10.1152/ajplung.00097.2001 (2002).
- 628 30 Berry, C. A. *et al.* Interleukin-1 in lipopolysaccharide induced chorioamnionitis in the fetal sheep.  
629 *Reprod Sci* **18**, 1092-1102, doi:10.1177/1933719111404609 (2011).
- 630 31 Nikiforou, M. *et al.* Intra-amniotic Candida albicans infection induces mucosal injury and  
631 inflammation in the ovine fetal intestine. *Sci Rep* **6**, 29806-29806, doi:10.1038/srep29806  
632 (2016).
- 633 32 McGovern, N. *et al.* Human fetal dendritic cells promote prenatal T-cell immune suppression  
634 through arginase-2. *Nature* **546**, 662-666, doi:10.1038/nature22795 (2017).

- 635 33 Xie, X. *et al.* Single-cell transcriptome profiling reveals neutrophil heterogeneity in homeostasis  
636 and infection. *Nature Immunology* **21**, 1119-1133, doi:10.1038/s41590-020-0736-z (2020).
- 637 34 Evrard, M. *et al.* Developmental Analysis of Bone Marrow Neutrophils Reveals Populations  
638 Specialized in Expansion, Trafficking, and Effector Functions. *Immunity* **48**, 364-379.e368,  
639 doi:10.1016/j.immuni.2018.02.002 (2018).
- 640 35 Presicce, P. *et al.* TNF-Signaling Modulates Neutrophil-Mediated Immunity at the Feto-Maternal  
641 Interface During LPS-Induced Intrauterine Inflammation. *Frontiers in Immunology* **11**,  
642 doi:10.3389/fimmu.2020.00558 (2020).
- 643 36 Metcalfe, A., Lisonkova, S., Sabr, Y., Stritzke, A. & Joseph, K. S. Neonatal respiratory morbidity  
644 following exposure to chorioamnionitis. *BMC Pediatr* **17**, 128-128, doi:10.1186/s12887-017-  
645 0878-9 (2017).
- 646 37 Lau, J. *et al.* Chorioamnionitis with a fetal inflammatory response is associated with higher  
647 neonatal mortality, morbidity, and resource use than chorioamnionitis displaying a maternal  
648 inflammatory response only. *American Journal of Obstetrics & Gynecology* **193**, 708-713,  
649 doi:10.1016/j.ajog.2005.01.017 (2005).
- 650 38 Kumar, S. K. M. & Bhat, B. V. Distinct mechanisms of the newborn innate immunity. *Immunology*  
651 *Letters* **173**, 42-54, doi:<https://doi.org/10.1016/j.imlet.2016.03.009> (2016).
- 652 39 Lawrence, S. M., Corriden, R. & Nizet, V. Age-Appropriate Functions and Dysfunctions of the  
653 Neonatal Neutrophil. *Frontiers in Pediatrics* **5**, doi:10.3389/fped.2017.00023 (2017).
- 654 40 Yu, J. C. *et al.* Innate Immunity of Neonates and Infants. *Frontiers in immunology* **9**, 1759-1759,  
655 doi:10.3389/fimmu.2018.01759 (2018).
- 656 41 McGrath-Morrow, S. A. *et al.* The innate immune response to lower respiratory tract E. Coli  
657 infection and the role of the CCL2-CCR2 axis in neonatal mice. *Cytokine* **97**, 108-116,  
658 doi:10.1016/j.cyto.2017.06.002 (2017).
- 659 42 Park, I. *et al.* Neutrophils disturb pulmonary microcirculation in sepsis-induced acute lung injury.  
660 *Eur Respir J* **53**, 1800786, doi:10.1183/13993003.00786-2018 (2019).
- 661 43 Zarbock, A., Singbartl, K. & Ley, K. Complete reversal of acid-induced acute lung injury by  
662 blocking of platelet-neutrophil aggregation. *J Clin Invest* **116**, 3211-3219, doi:10.1172/JCI29499  
663 (2006).
- 664 44 Filep, J. G. & Ariel, A. Neutrophil heterogeneity and fate in inflamed tissues: implications for the  
665 resolution of inflammation. *American Journal of Physiology-Cell Physiology* **319**, C510-C532,  
666 doi:10.1152/ajpcell.00181.2020 (2020).
- 667 45 Silvestre-Roig, C., Hidalgo, A. & Soehnlein, O. Neutrophil heterogeneity: implications for  
668 homeostasis and pathogenesis. *Blood* **127**, 2173-2181, doi:10.1182/blood-2016-01-688887  
669 (2016).
- 670 46 Ng, L. G., Ostuni, R. & Hidalgo, A. Heterogeneity of neutrophils. *Nature Reviews Immunology* **19**,  
671 255-265, doi:10.1038/s41577-019-0141-8 (2019).
- 672 47 Alder, M. N. *et al.* Olfactomedin 4 marks a subset of neutrophils in mice. *Innate Immun* **25**, 22-  
673 33, doi:10.1177/1753425918817611 (2019).
- 674 48 Hu, N. *et al.* Coexpression of CD177 and membrane proteinase 3 on neutrophils in  
675 antineutrophil cytoplasmic autoantibody-associated systemic vasculitis: Anti-proteinase 3-  
676 mediated neutrophil activation is independent of the role of CD177-expressing neutrophils.  
677 *Arthritis & Rheumatism* **60**, 1548-1557, doi:10.1002/art.24442 (2009).
- 678 49 Pillay, J. *et al.* A subset of neutrophils in human systemic inflammation inhibits T cell responses  
679 through Mac-1. *J Clin Invest* **122**, 327-336, doi:10.1172/JCI57990 (2012).
- 680 50 Vier, J., Groth, M., Sochalska, M. & Kirschnek, S. The anti-apoptotic Bcl-2 family protein A1/Bfl-1  
681 regulates neutrophil survival and homeostasis and is controlled via PI3K and JAK/STAT signaling.  
682 *Cell Death Dis* **7**, e2103-e2103, doi:10.1038/cddis.2016.23 (2016).

- 683 51 Gschwandtner, M., Derler, R. & Midwood, K. S. More Than Just Attractive: How CCL2 Influences  
684 Myeloid Cell Behavior Beyond Chemotaxis. *Frontiers in Immunology* **10**,  
685 doi:10.3389/fimmu.2019.02759 (2019).
- 686 52 Petty, J. M. *et al.* Pulmonary Stromal-Derived Factor-1 Expression and Effect on Neutrophil  
687 Recruitment during Acute Lung Injury. *The Journal of Immunology* **178**, 8148-8157,  
688 doi:10.4049/jimmunol.178.12.8148 (2007).
- 689 53 Konrad, F. M., Meichssner, N., Bury, A., Ngamsri, K.-C. & Reutershan, J. Inhibition of SDF-1  
690 receptors CXCR4 and CXCR7 attenuates acute pulmonary inflammation via the adenosine A(2B)-  
691 receptor on blood cells. *Cell Death Dis* **8**, e2832-e2832, doi:10.1038/cddis.2016.482 (2017).
- 692 54 Metzemaekers, M., Gouwy, M. & Proost, P. Neutrophil chemoattractant receptors in health and  
693 disease: double-edged swords. *Cell Mol Immunol* **17**, 433-450, doi:10.1038/s41423-020-0412-0  
694 (2020).
- 695 55 Zacharias, W. & Morrisey, E. Isolation and culture of human alveolar epithelial progenitor cells.  
696 *Protoc. Exch* (2018).
- 697 56 Travaglini, K. J. *et al.* A molecular cell atlas of the human lung from single-cell RNA sequencing.  
698 *Nature* **587**, 619-625, doi:10.1038/s41586-020-2922-4 (2020).
- 699 57 DePasquale, E. A. K. *et al.* cellHarmony: cell-level matching and holistic comparison of single-cell  
700 transcriptomes. *Nucleic Acids Res* **47**, e138, doi:10.1093/nar/gkz789 (2019).
- 701 58 Chen, J., Bardes, E. E., Aronow, B. J. & Jegga, A. G. ToppGene Suite for gene list enrichment  
702 analysis and candidate gene prioritization. *Nucleic Acids Res* **37**, W305-W311,  
703 doi:10.1093/nar/gkp427 (2009).

704

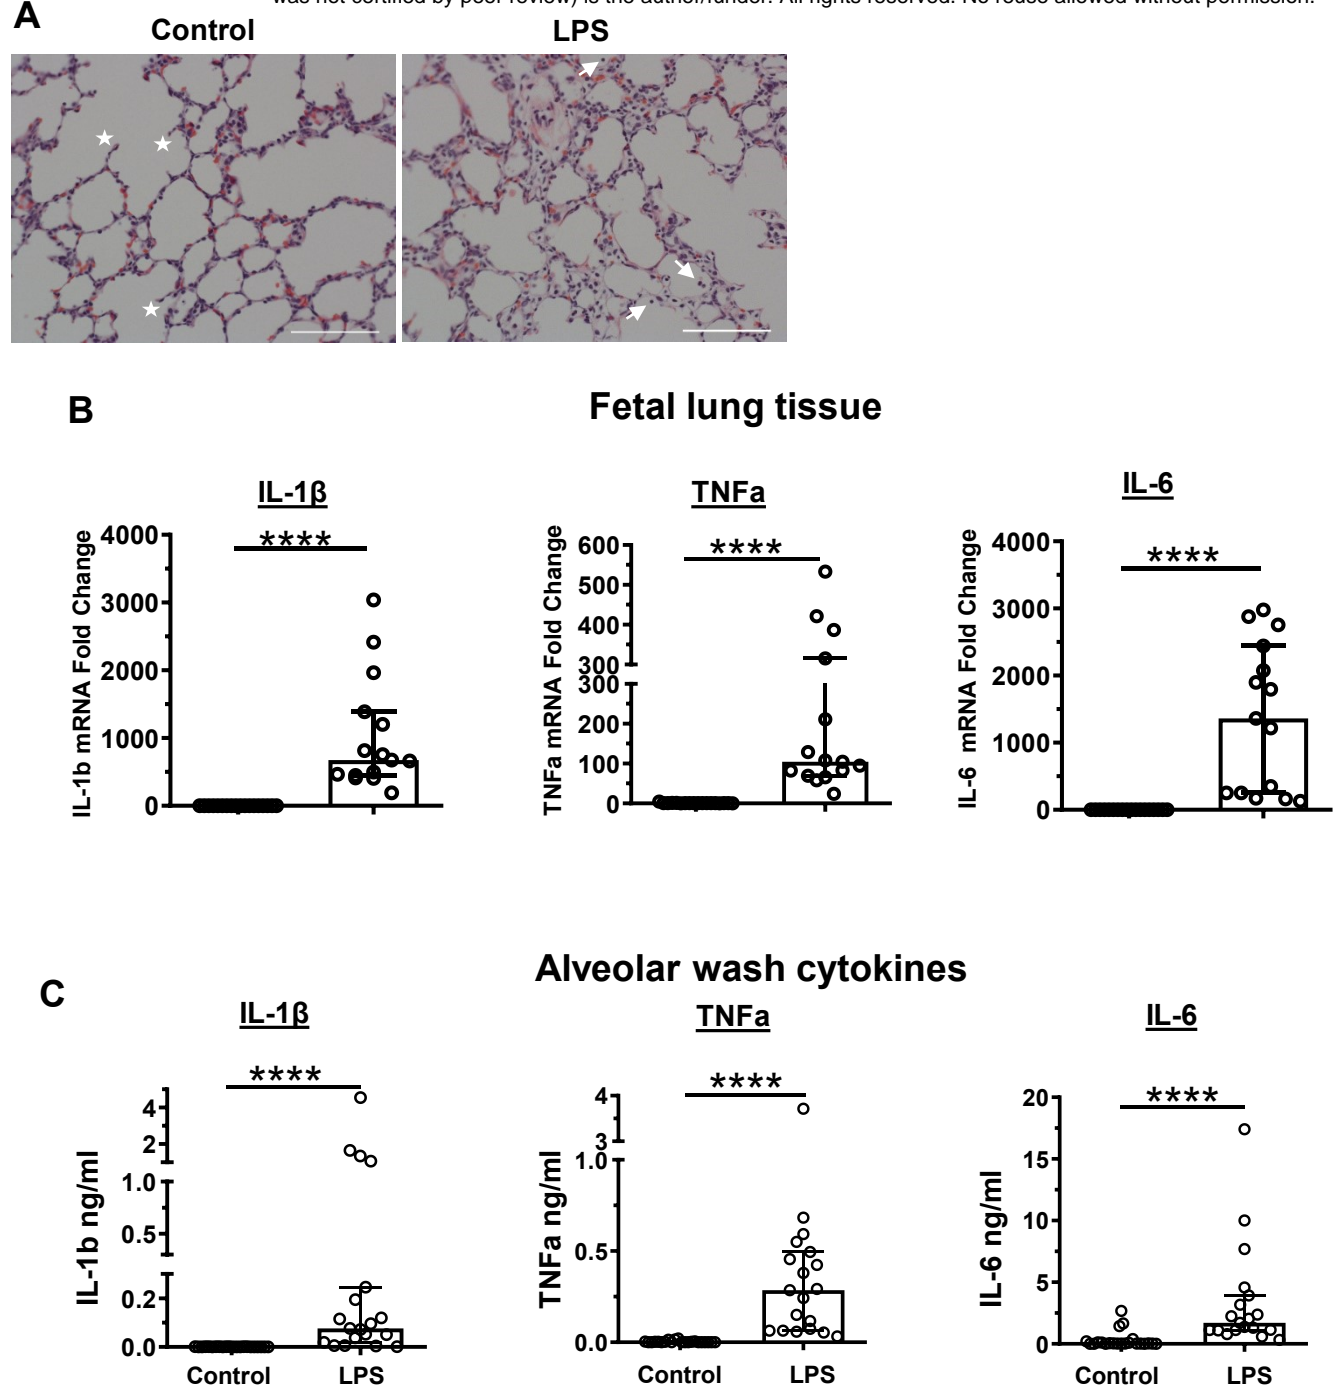

**Fig. 1. Fetal lung response 16 hours post IA LPS exposure. (A)** 20x hematoxylin & eosin (H&E) stain of fetal lung from control and LPS exposed fetuses at 16 hours following IA LPS exposure; stars denote secondary septa, arrows represent infiltrating cells in alveolar space and scale bar is 100 $\mu$ m. IL-1 $\beta$ , TNF $\alpha$ , and IL-6, mRNA expression in fetal lung tissue **(B)** and concentration in the alveolar wash **(C)** in control and 16 hours post IA LPS. Data presented as median and interquartile range, Mann-Whitney U test; \*\*\*\* $p \leq 0.0001$ .

**Fig. 2**

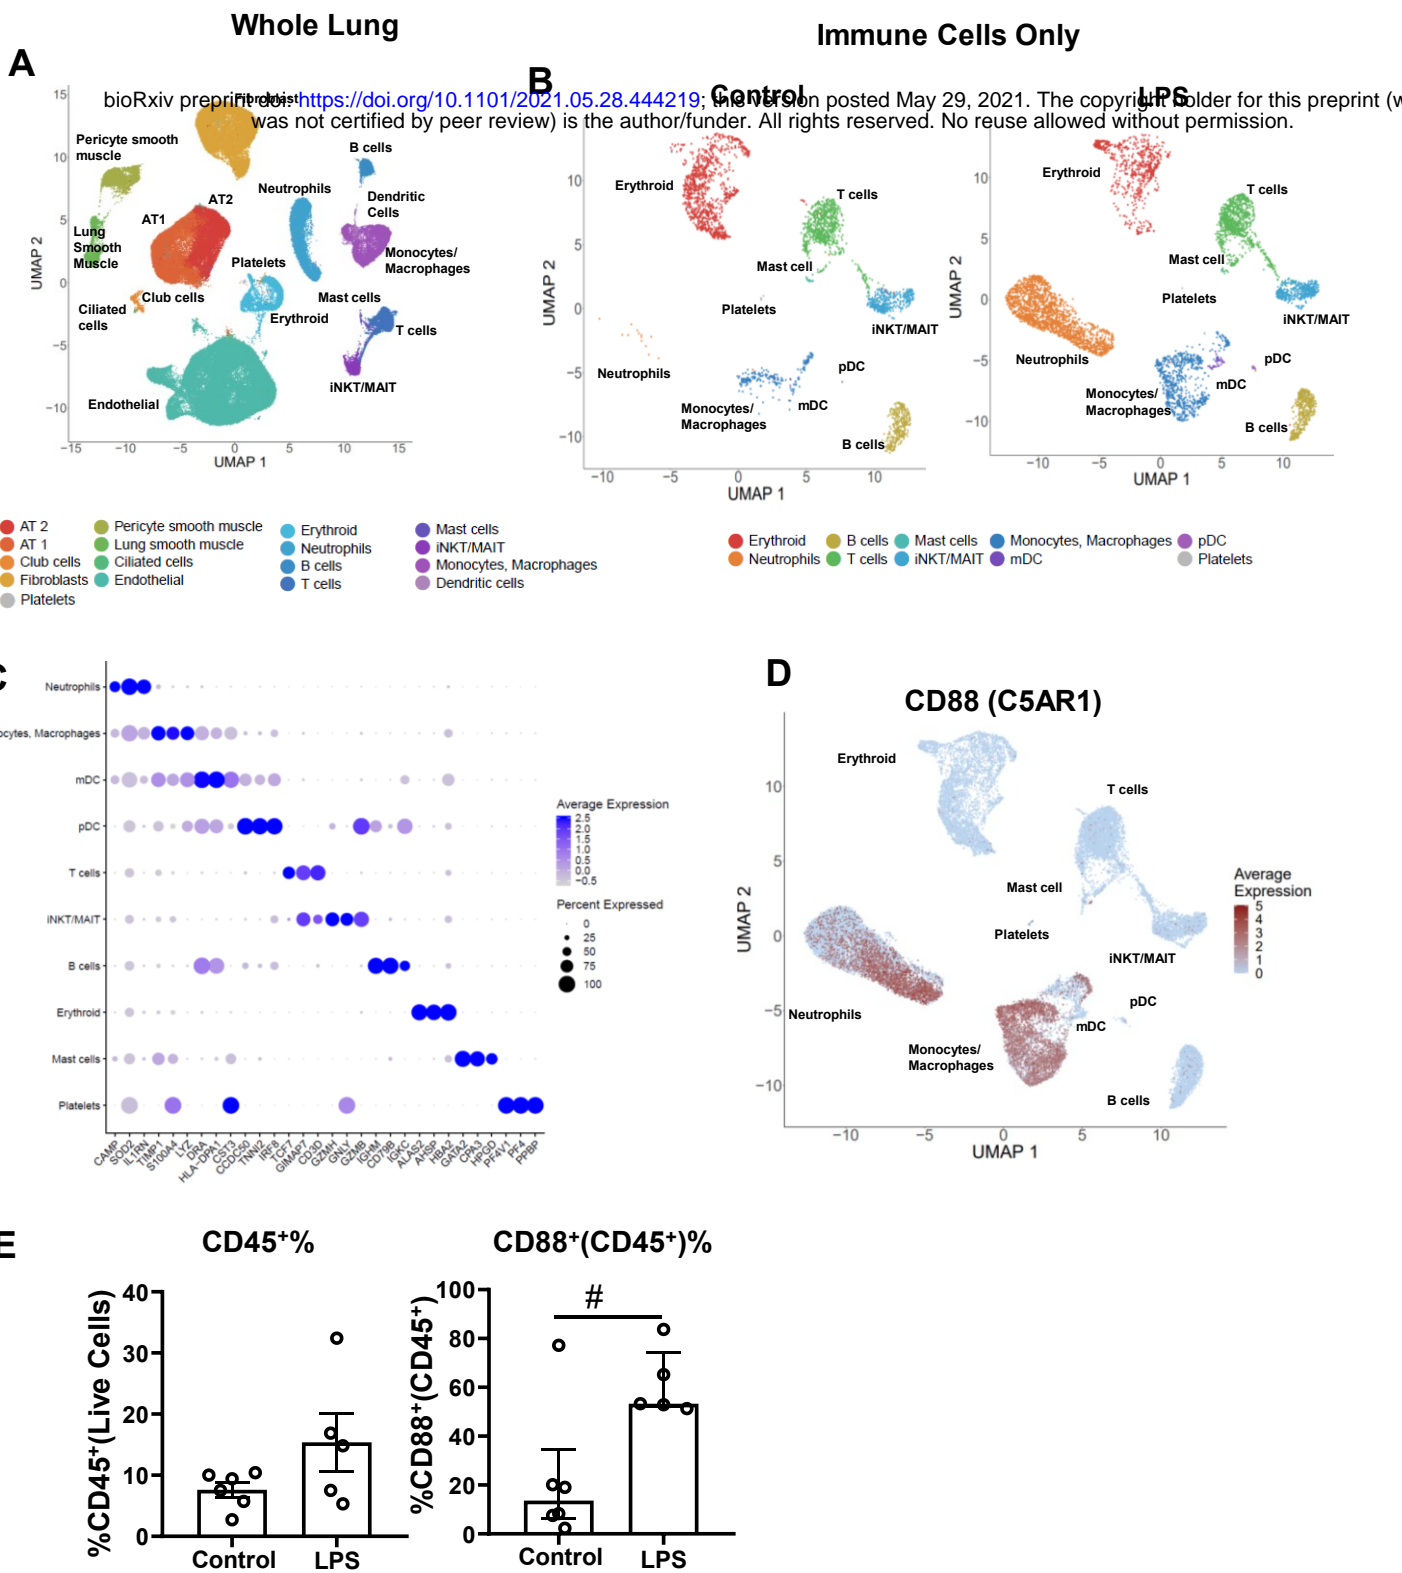

**Fig. 2. Single cell RNAseq analysis of the fetal lung 16 hours post IA LPS exposure.** The left lobe of fetal lung was processed into single cell suspensions and submitted for single cell sequencing. **(A)** UMAP from combined control and LPS-exposed animals (2 each). **(B)** Control (left) and IA LPS (right) exposed animals UMAP of re-clustered immune cell populations. **(C)** Representative dot plot of canonical cell type markers used in the identification of hematopoietic populations. **(D)** Feature plot of CD88(C5AR1) expression across hematopoietic cell populations and **(E)** percentage of total CD45<sup>+</sup> within live cells and CD88<sup>+</sup> within CD45<sup>+</sup> cells in lung. Data presented as mean with SEM, student's unpaired t-test (CD45<sup>+</sup>) or median and interquartile range, Mann-Whitney U test (CD88<sup>+</sup>); #0.05≥p≤0.10.

## Fig. 3

**A**

bioRxiv preprint doi: <https://doi.org/10.1101/2021.05.28.444219>; this version posted May 29, 2021. The copyright holder for this preprint (which was not certified by peer review) is the author/funder. All rights reserved. No reuse allowed without permission.

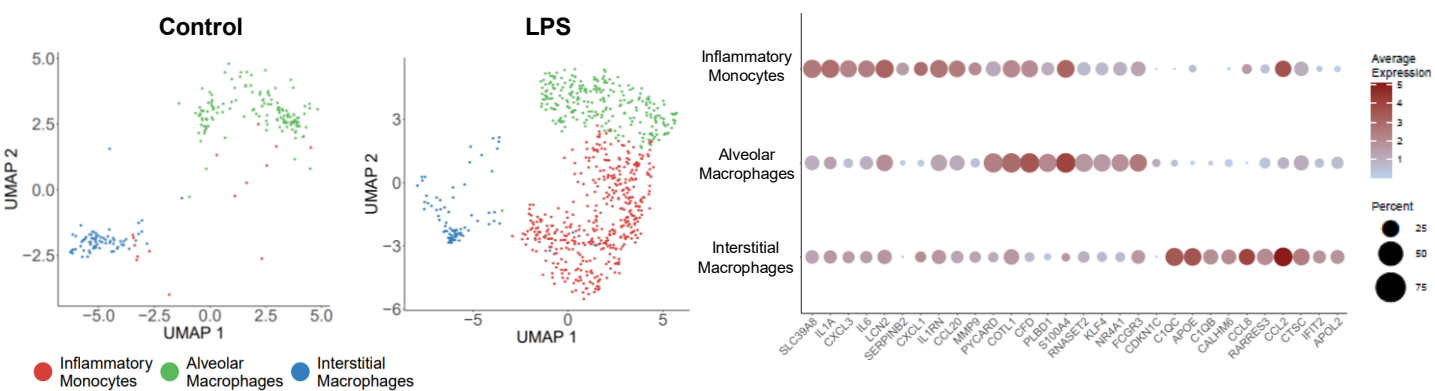

**C**

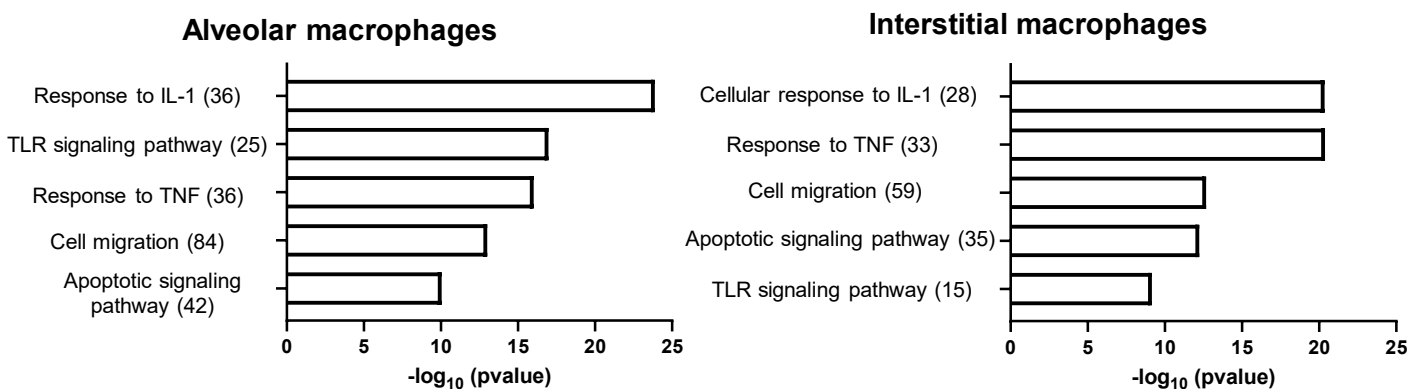

**D**

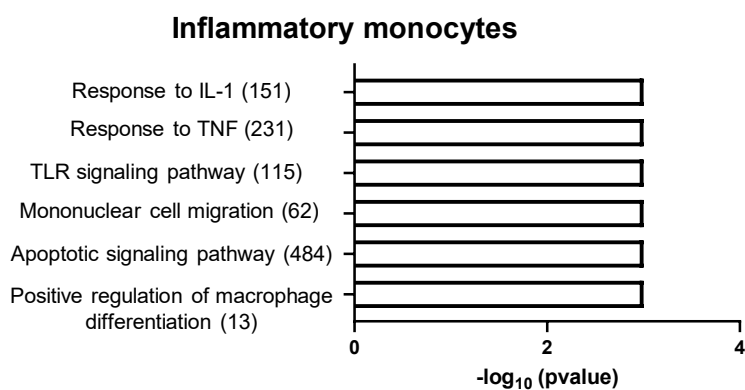

**Fig. 3. Fetal lung monocyte/macrophage response to IA LPS. (A)** UMAPs of fetal lung myeloid cell populations in control (left) and IA LPS (right) fetuses. **(B)** Bubble plot of the top 10 conserved genes in the inflammatory monocyte, alveolar macrophage, and interstitial macrophage populations in the fetal lung of IA LPS exposed fetuses. **(C)** Functional enrichment analysis of upregulated biological processes based on differentially expressed genes (alveolar, interstitial macrophages) using ToppFun. **(D)** ssGSEA analysis of enriched gene ontology (GO) terms in inflammatory monocytes. Numbers in parentheses represent the total number of genes for each process.



**Fig. 4**

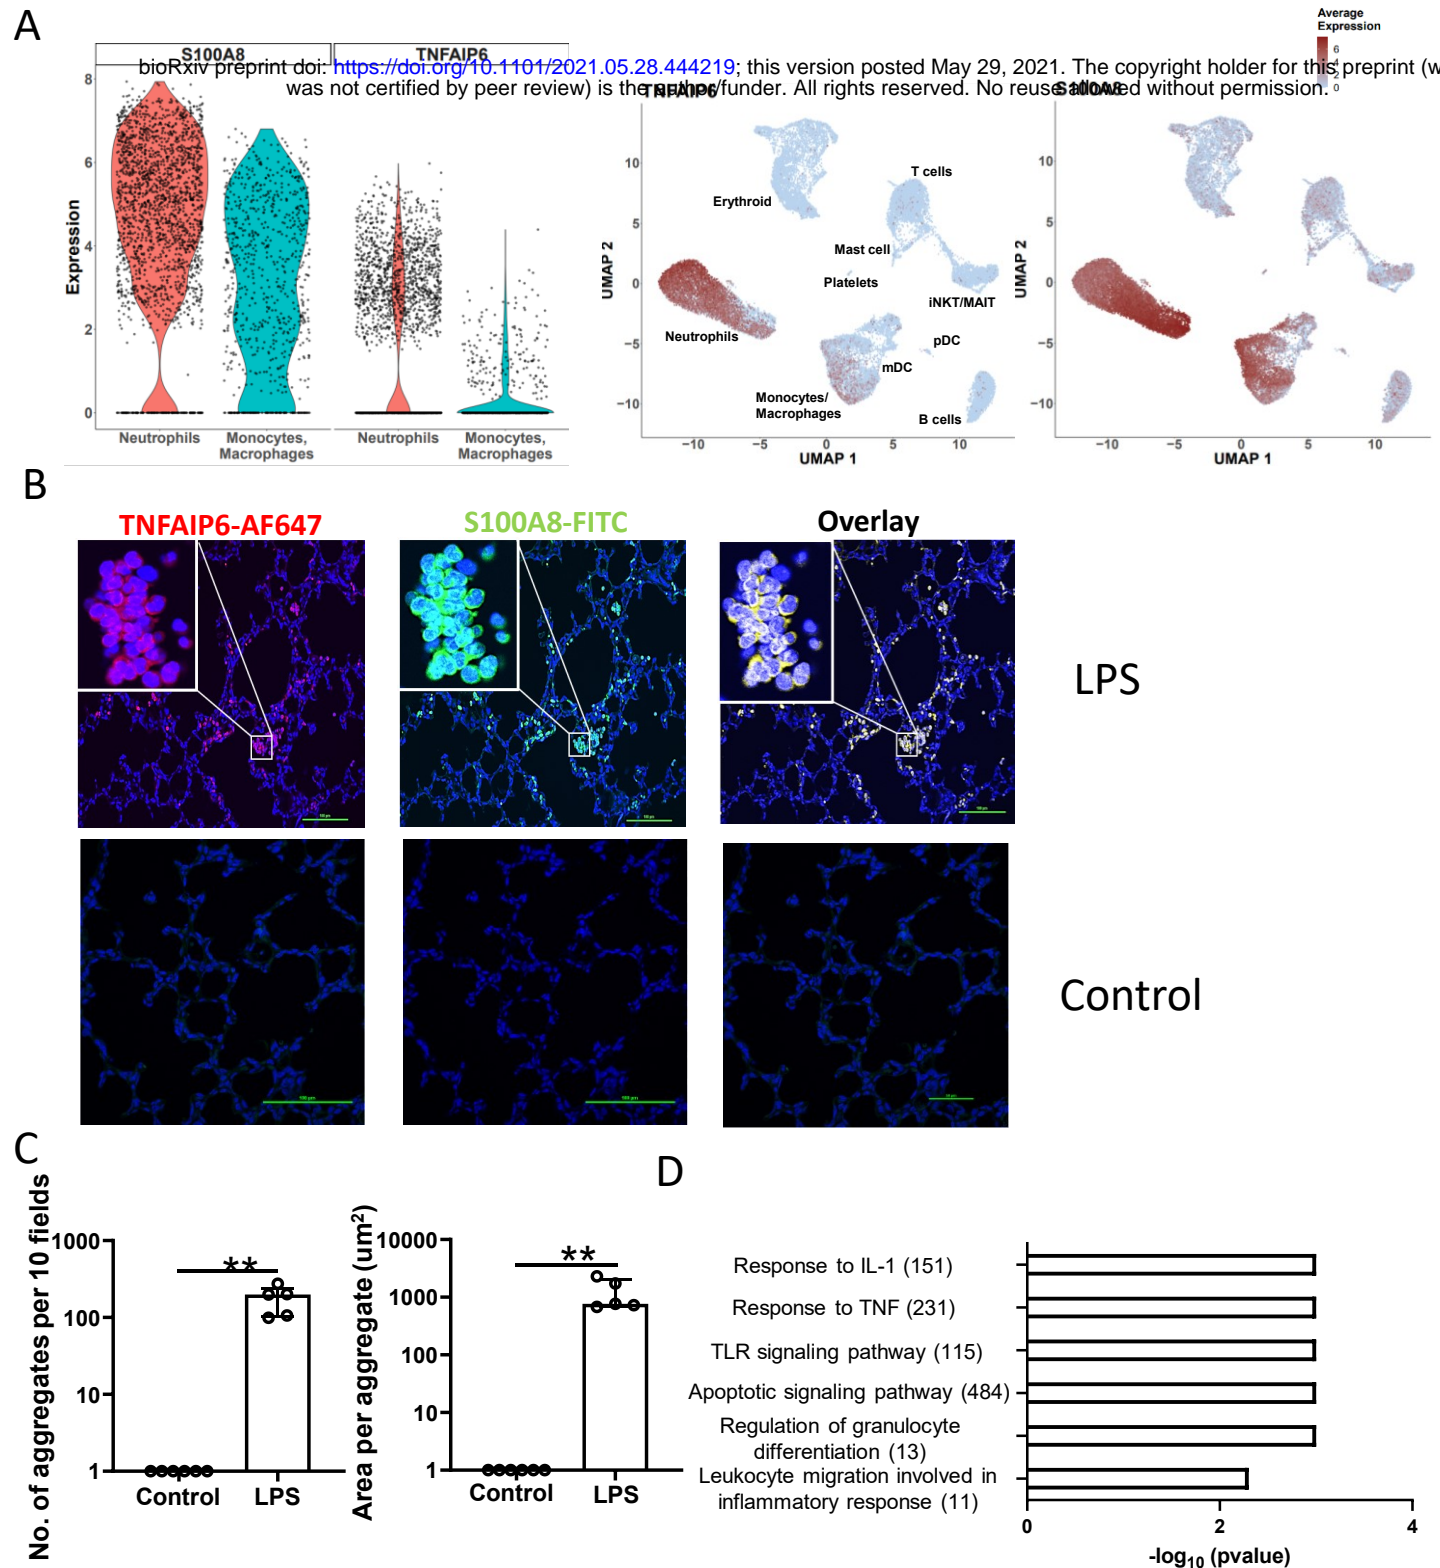

**Fig. 4. Fetal lung neutrophil response to IA LPS. (A)** Violin (left) and feature (right) plot of TNFAIP6 and S100A8 expression in fetal lung neutrophils and monocyte/macrophage population following IA LPS exposure. **(B)** Immunofluorescence of IA LPS exposed fetal lung stained for S100A8 and TNFAIP6; scale bar is 100 $\mu$ m. **(C)** Neutrophil aggregate count (left) and area (right) in the fetal lungs of control and IA LPS fetuses. Data presented as median and interquartile range, Mann-Whitney U test; \*\* $p \leq 0.01$ . **(D)** ssGSEA analysis of enriched GO terms in neutrophils. Numbers in parentheses represent the total number of genes for each process.

**Fig. 5**

bioRxiv preprint doi: <https://doi.org/10.1101/2021.05.28.444219>; this version posted May 29, 2021. The copyright holder for this preprint (which was not certified by peer review) is the author/funder. All rights reserved. No reuse allowed without permission.

**A**

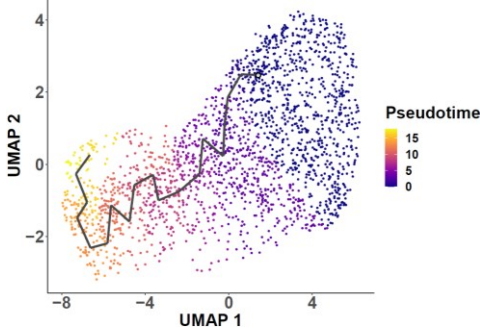

**B**

**Response to IL-1**

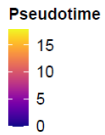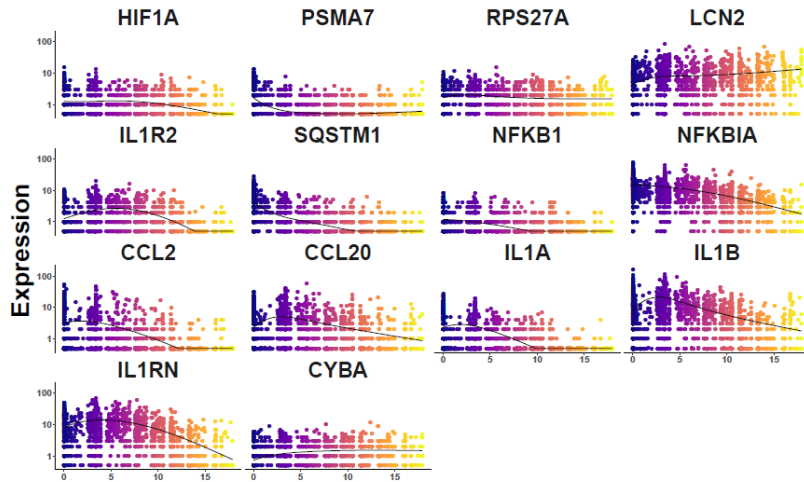

**TLR Receptor Signaling Pathway**

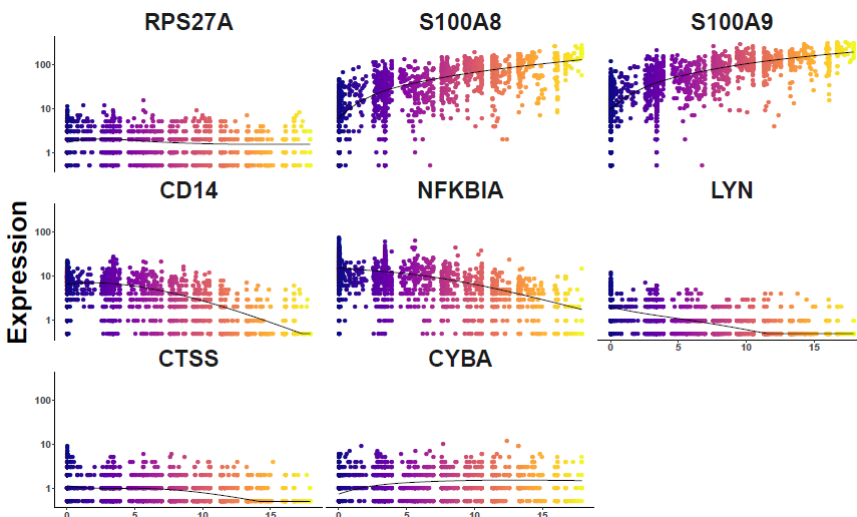

**Fig. 5. Pseudo-time analysis of fetal lung neutrophil response to IA LPS. (A)** Pseudo-time trajectory analysis of IA LPS exposed fetal lung neutrophils using Monocle. **(B)** Plots of genes from GO biological pathways response to IL-1 and TLR signaling pathway across pseudo-time.

**Fig. 6**

**A**

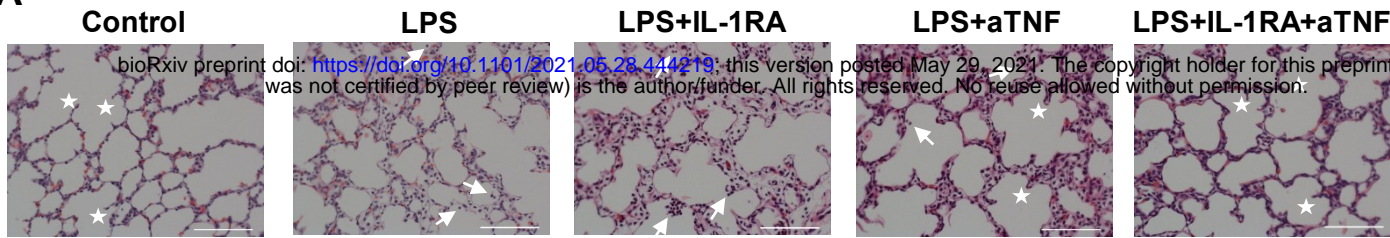

**B**

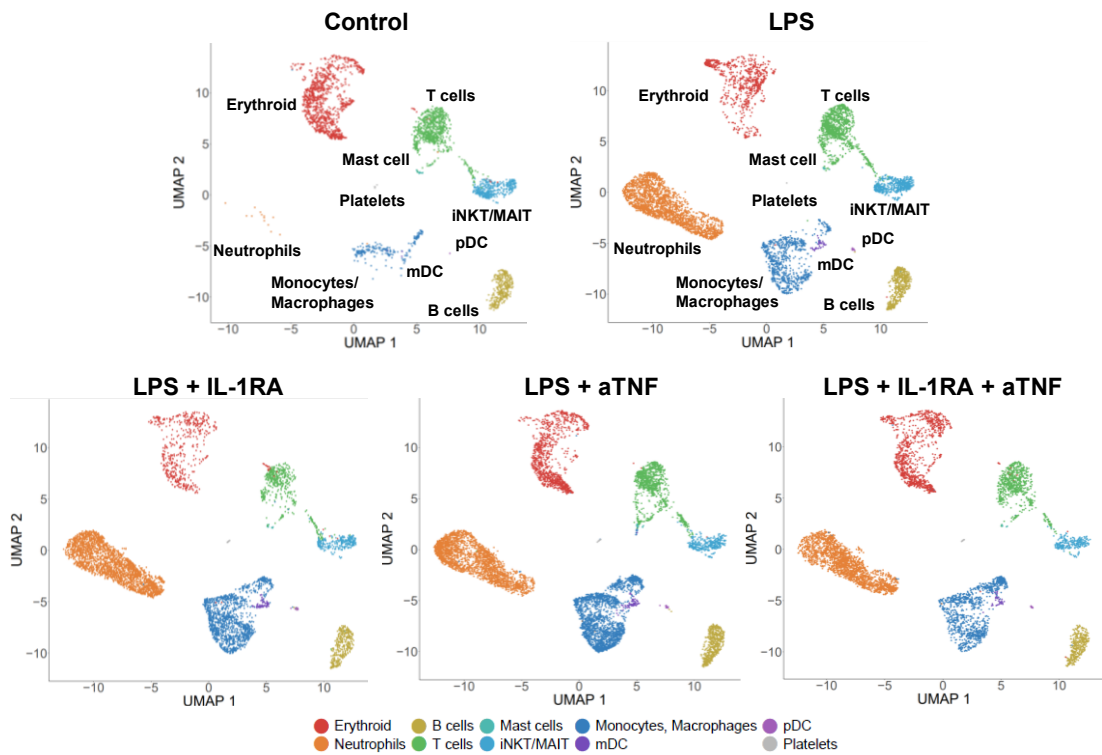

**C**

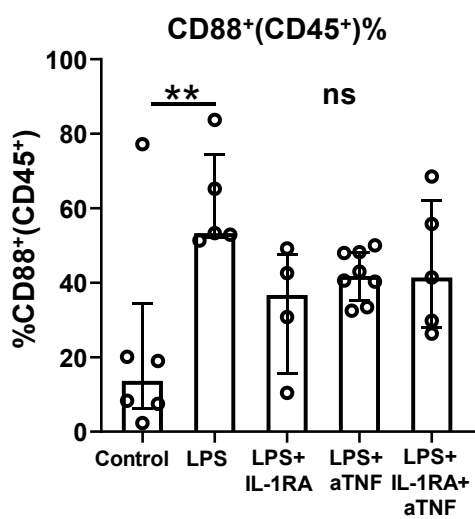

**Fig. 6. Hematopoietic cell changes in the fetal lung following blocking IL-1 and TNF signaling. (A)** 20x H&E sections of fetal control, lps, lps+IL-1RA, lps+anti-TNF, and lps+IL-1RA+anti-TNF exposed animals; stars denote secondary septa, arrows represent cells in alveolar space and scale bar is 100µm. **(B)** UMAPs of the hematopoietic cells from control, lps, lps+IL-1RA, lps+anti-TNF, and lps+ IL-1RA+anti-TNF exposed animals. **(C)** CD88<sup>+</sup> percentage within the CD45<sup>+</sup> cells. Data presented as median and interquartile range, Kruskal-Wallis test; \*\*p≤0.01.

**Fig. 7**

**A**

bioRxiv preprint doi: <https://doi.org/10.1101/2021.05.28.444219>; this version posted May 29, 2021. The copyright holder for this preprint (which was not certified by peer review) is the author/funder. All rights reserved. No reuse allowed without permission.

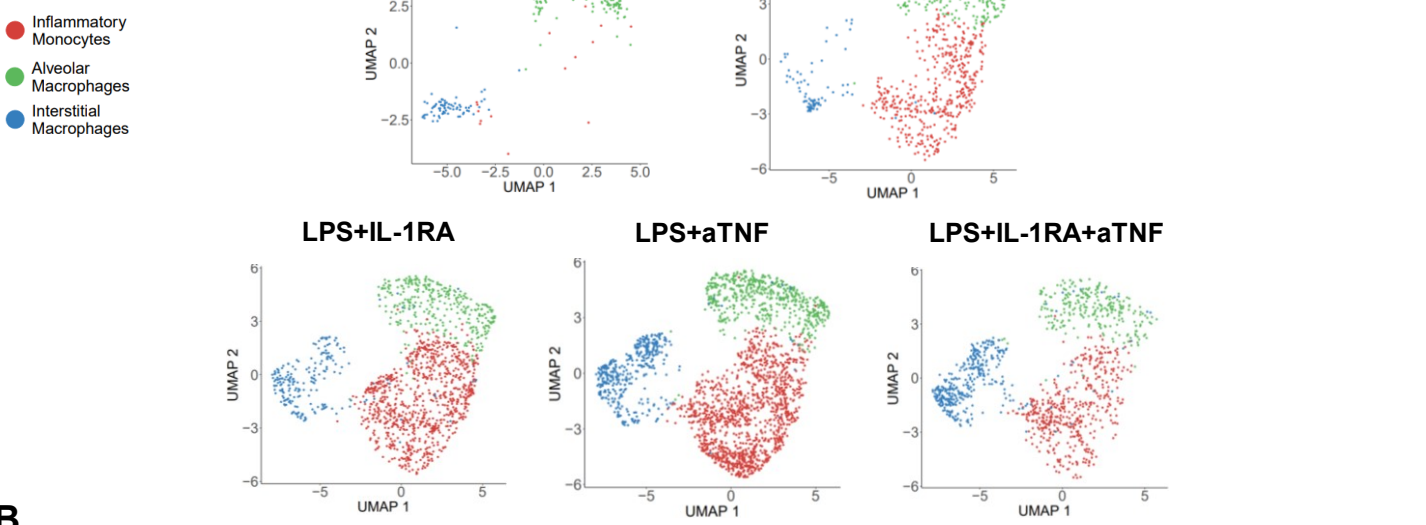

**B**

**Alveolar Macrophages**

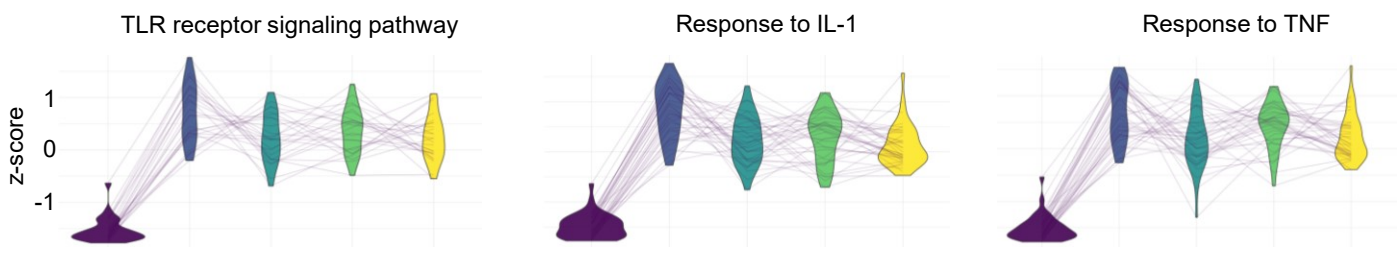

**Interstitial Macrophages**

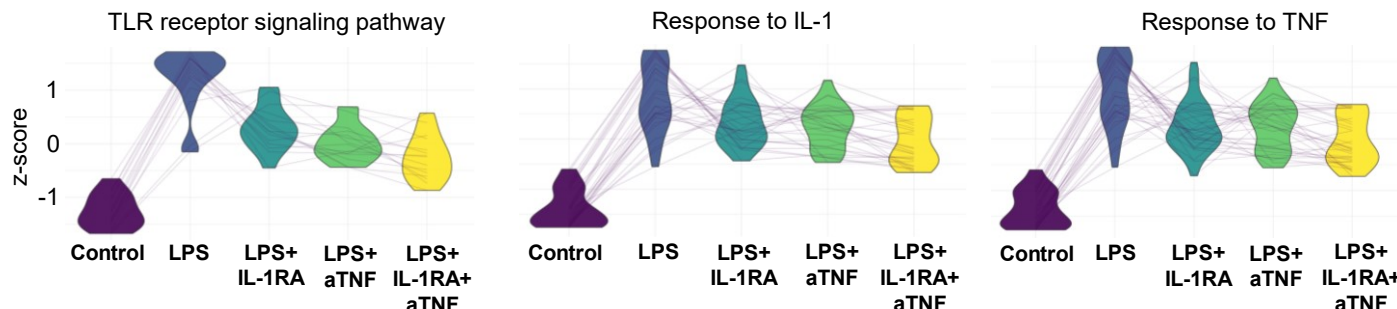

**Inflammatory Monocytes**

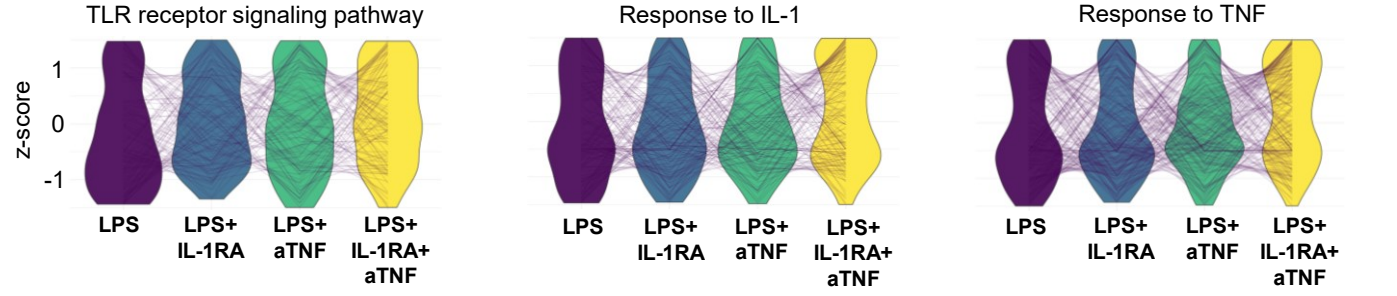

**Fig. 7. Fetal lung monocyte/macrophage population across treatment conditions. (A)** UMAPs of fetal lung myeloid populations and **(B)** parallel coordinate plots of scaled expression of representative genes in select biological processes across treatment conditions in alveolar, interstitial macrophages and inflammatory monocytes.

## Fig. 8

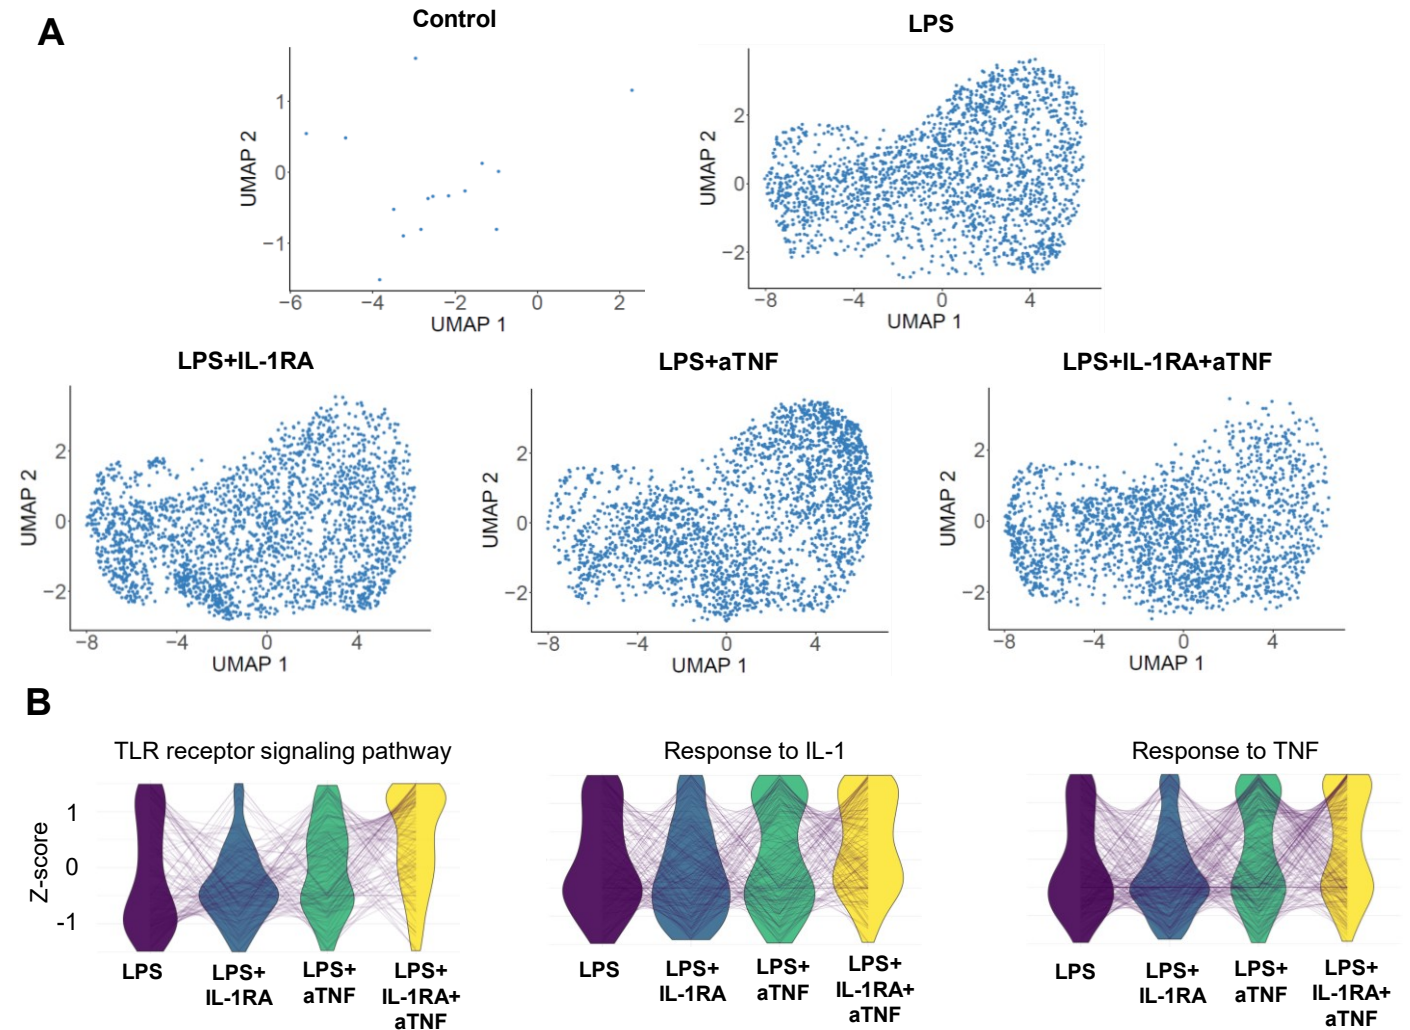

**Fig. 8. Fetal lung neutrophils in response to IA LPS and blockades. (A)** UMAPs of the neutrophil population across treatment conditions. **(B)** Parallel coordinate plots of scaled expression of representative genes in select biological processes across treatment conditions.
